# Supplementary material for: Syntheses and fluorescence properties of lanthanide isostructural complexes derived from aspartic acid
Source: Royal Society of Chemistry journal article supplement (doi:10.1039/d3dt00377a), 2023-01-01
Supplement: d3dt00377a1.pdf [file d3dt00377a1.pdf]

**Supporting Information for the Manuscript**

**Syntheses and fluorescence properties of lanthanide isostructural complexes derived from aspartic acid**

Yatong Zhang,<sup>a</sup> Ai Wang,<sup>\*a,b</sup> Sisi Feng,<sup>a,b</sup> Caixia Yuan,<sup>a</sup> Liping Lu<sup>\*a</sup>

<sup>a</sup> Institute of Molecular Science, Key Laboratory of Chemical Biology and Molecular Engineering of the Education Ministry, Shanxi University, Taiyuan, Shanxi 030006, People's Republic of China.

<sup>b</sup> Key Laboratory of Materials for Energy Conversion and Storage of Shanxi Province; Shanxi University, Taiyuan, Shanxi 030006, People's Republic of China.

\*Corresponding authors, E-mail: aiwang@sxu.edu.cn; luliping@sxu.edu.cn.

## Content

### S1 Experiment content

#### S1.1 Materials and physical measurements

#### S1.2 X-ray crystallographic analyses

#### S1.3 Fluorescence detection experiment

#### S1.4 Fluorescent test strips test

#### S1.5 Fluorescent sensing film

#### S1.6 Fluorescence quantum yield measurements

**Table S1** Crystal data and structure refinement for complexes **1 – 6**

**Table S2** Selected bond lengths (Å) and bond angles (°) for complexes **1 – 6**

**Table S3** Weak interaction (Å and °) for complexes **1 – 6**

**Table S4** Quantum yield results of complexes **1 – 6**

**Table S5** Comparison of various complex sensors for detecting  $\text{Cr}_2\text{O}_7^{2-}$ ,  $\text{CrO}_4^{2-}$ , CTC or TC

**Table S6** Quantum yield results of complex **6** after adding  $\text{Cr}_2\text{O}_7^{2-}$ ,  $\text{CrO}_4^{2-}$ , CTC or TC

**Table S7** Resonance energy transfer efficiency of complex **6**. ( $E = 1 - \tau_1/\tau_0$ , where  $\tau_1$  and  $\tau_0$  are the excited-state lifetime of  $\text{Cr}_2\text{O}_7^{2-}$ ,  $\text{CrO}_4^{2-}$ , CTC or TC in the presence and absence of complex **6**)

**Fig. S1** IR spectra of ligand ( $\text{H}_3\text{caa}$ ) and complexes **1 – 6** (KBr,  $\text{cm}^{-1}$ )

**Fig. S2** Coordination environment diagrams of complexes **1 – 5**

**Fig. S3** The shortest Ln-O bond length of complexes **1 – 6**

**Fig. S4** PXRD patterns (simulated and experimental) for complexes **1 – 6** in the  $2\theta$  range of 5 to  $50^\circ$

**Fig. S5** TGA curves for complexes **1 – 6** collected under air atmosphere

**Fig. S6** Solid-state luminescent spectra of ligand ( $\text{H}_3\text{caa}$ )

**Fig. S7** PXRD patterns of complex **6** at room temperature (green) and after heating at  $95^\circ\text{C}$  (pink)

**Fig. S8** PXRD patterns of complex **6** before (green) and after soaking in different pH = 3 – 13

**Fig. S9** Fluorescence intensity for the recognition of (a)  $\text{Cr}_2\text{O}_7^{2-}$  or (b)  $\text{CrO}_4^{2-}$  after five cycles of isolation and re-suspending complex **6** in water

**Fig. S10** Standard curves of  $(R + B) / 2G$  formula to qualitatively analyse the strips of (a)  $\text{Cr}_2\text{O}_7^{2-}$  or (b)  $\text{CrO}_4^{2-}$

**Fig. S11** Anti-interference of complex **6** to (a) CTC or (b) TC in the presence of other biomolecules at 543 nm

**Fig. S12** Fluorescence intensity for the recognition of (a) CTC or (b) TC after five cycles of isolation and re-suspending complex **6** in water

**Fig. S13** Color changes of complex **6** strips for detecting (a) CTC (0 ~ 25  $\mu\text{M}$ ) or (d) TC (0 ~ 40  $\mu\text{M}$ ). The standard curves of (b, e)  $(R + G) / 2B$  formula and (c, f)  $(G + B) / 2R$  formula to qualitatively analyse the strip

**Fig. S14** Standard curves of  $(R + B) / 2G$  formula to qualitatively analyse the strips of (a) CTC or (b) TC

**Fig. S15** IR spectra of complex **6** before and after soaking in  $\text{Cr}_2\text{O}_7^{2-}$ ,  $\text{CrO}_4^{2-}$ , CTC or TC for 7 days

**Fig. S16** PXRD patterns of complex **6** before and after soaking in  $\text{Cr}_2\text{O}_7^{2-}$ ,  $\text{CrO}_4^{2-}$ , CTC or TC for 7 days

**Fig. S17** Liquid UV-vis spectra of complex **6**,  $\text{Cr}_2\text{O}_7^{2-}$ ,  $\text{CrO}_4^{2-}$ , CTC and TC in the aqueous solution

**Fig. S18** Liquid UV-vis spectra of complex **6** with the addition of different concentrations of  $\text{Cr}_2\text{O}_7^{2-}$ ,  $\text{CrO}_4^{2-}$ , CTC or TC

**Fig. S19** Emission spectrum of complex **6** and the absorption spectra of  $\text{Cr}_2\text{O}_7^{2-}$ ,  $\text{CrO}_4^{2-}$ , CTC and TC

**Fig. S20** Photoluminescence decay times of complex **6** before and after loading in  $\text{Cr}_2\text{O}_7^{2-}$ ,  $\text{CrO}_4^{2-}$ , CTC or TC

**Fig. S21** XPS spectra of complex **6** before and after loading in  $\text{Cr}_2\text{O}_7^{2-}$  or  $\text{CrO}_4^{2-}$

## **S1 Experiment content**

### **S1.1 Materials and physical measurements**

The N-(4-carboxylbenzyl)-L-aspartic acid (H<sub>3</sub>caa) was used as the ligand in this work and purchased from Jinan Trading Company, China. Other chemicals and solvents were reagent grade and purchased directly without secondary treatment. Element analysis (CHN) was performed using a PerkinElmer 240 elemental analyzer. Samples' infra-red spectra were recorded on a Bruker TENSOR27 spectrometer with KBr pellets in the range of 4000 – 400 cm<sup>-1</sup>. The power X-ray diffraction (PXRD) patterns were recorded by using a Bruker D8 Advance X-ray Diffractometer with Cu K $\alpha$  radiation at a scan speed of 5 °·min<sup>-1</sup> in the range of  $2\theta = 5 - 50$  °. The thermogravimetric analysis (TGA) data of complexes **1** – **6** was carried out on a DuPont thermal analyzer from room temperature to 860°C under an air atmosphere with the heating rate of 10°C·min<sup>-1</sup>. Room temperature fluorescence spectra and the photoluminescence quantum yield were obtained by using an Edinburge FS5 Spectrofluorometer with a xenon arc lamp as the light source. The UV-Vis absorption spectra were obtained *via* a Hewlett Packard HP-8453 UV absorption spectrometer.

### **S1.2 X-ray crystallographic analyses**

The single-crystal X-ray diffraction data for complexes **1** – **6** were collected on a Bruker D8-Quest diffractometer equipped with a Photon 100 detector by using graphite-monochromated Mo-K $\alpha$  radiation ( $\lambda = 0.71073$  Å) at normal temperature. The program SADABS was used for absorption corrections<sup>S1</sup>. The crystal structures were solved by direct methods and refined by full-matrix least-squares methods

against  $F^2$  with SHELX-2014 program <sup>S2</sup>. All non-hydrogen atoms were refined anisotropically and refined using a riding model approximation. Hydrogen atoms attached to C atoms were placed geometrically and refined using a riding model approximation, with  $C(sp^2) - H = 0.93 \text{ \AA}$  and  $U_{iso}(H) = 1.2U_{eq}(C)$ . The H atoms bonded to O atoms were assigned isotropic displacement parameters  $U_{iso}(H) = 1.5U_{eq}(O)$ . The H atoms bonded to N atoms were assigned isotropic displacement parameters  $U_{iso}(H) = 1.2U_{eq}(N)$ . The structure refinement details, crystallographic data and data collection are provided in Table S1. Some chosen bond lengths, angles and hydrogen bonds information are listed in Tables S2 and S3.

### S1.3 Fluorescence detection experiment

Photoluminescence (PL) measurements were carried out using complex **6**. The aqueous suspension was prepared by grinding 5.0 mg complex **6** into 50.00 mL aqueous solution ( $\sim 0.1 \text{ g/L}$ ), ultrasonic treatment for 30 min, and then aging for 2 days which were filtered by using  $0.22 \text{ \mu m}$  filter membranes to form a transparent suspension before fluorescence detection experiment. By adding 200  $\mu\text{L}$  different ions (0.1 mmol/L, as  $\text{K}^+$ ,  $\text{Na}^+$ ,  $\text{Mg}^{2+}$ ,  $\text{Ca}^{2+}$ ,  $\text{Ba}^{2+}$ ,  $\text{Mn}^{2+}$ ,  $\text{Co}^{2+}$ ,  $\text{Ni}^{2+}$ ,  $\text{Zn}^{2+}$ ,  $\text{Cd}^{2+}$ ,  $\text{Cr}^{3+}$ ,  $\text{Ga}^{3+}$ ,  $\text{Al}^{3+}$ ,  $\text{Ce}^{3+}$ ,  $\text{Dy}^{3+}$ ,  $\text{Gd}^{3+}$ ,  $\text{La}^{3+}$ ,  $\text{Nd}^{3+}$ ,  $\text{Eu}^{3+}$ ,  $\text{Pr}^{3+}$ ,  $\text{Ho}^{3+}$ ,  $\text{Sm}^{3+}$ ,  $\text{Er}^{3+}$ ,  $\text{Tb}^{3+}$ ,  $\text{Cl}^-$ ,  $\text{Br}^-$ ,  $\text{I}^-$ ,  $\text{C}_2\text{O}_4^{2-}$ ,  $\text{CO}_3^{2-}$ ,  $\text{NO}_3^-$ ,  $\text{OH}^-$ ,  $\text{HPO}_4^{2-}$ ,  $\text{SO}_4^{2-}$ ,  $\text{H}_2\text{PO}_4^-$ ,  $\text{CH}_3\text{COO}^-$  and  $\text{HCO}_3^-$ ) or different biomolecules [0.1 mmol/L, such as Ibuprofen (IBU), Gemfibrozil (GEM), Sulfamethoxazole (SMZ), Trimethoprim (TMP), Diclofenac (DCF), Ornidazole (ORN), 4-Acetamidophenol (APAP), Chlorotetracycline hydrochloride (CTC), Tetracycline hydrochloride (TC), Glycine (Gly), Isoleucine (Ile), Proline (Pro), Valine

(Val), Alanine (Ala), Serine (Ser), Methionine (Met), Glutamic acid (Glu), Histidine (His), Threonine (Thr), Aspartic acid (Asp), Leucine (Leu), Arginine (Arg), Phenylalanine (Phe), Lysine (Lys), Tyrosine (Tyr), Cysteine (Cys) and Ascorbic acid (AA)] into 2.0 mL complex **6** aqueous suspension enable the detection of different ions to be completed. The fluorescence sensing properties of complex **6** to  $\text{Cr}_2\text{O}_7^{2-}$ ,  $\text{CrO}_4^{2-}$ , CTC and TC were further explored by collecting emission spectra of 0.1 mmol/L  $\text{Cr}_2\text{O}_7^{2-}$ ,  $\text{CrO}_4^{2-}$ , CTC and TC ions (0 ~ 200  $\mu\text{L}$ ) in complex **6** aqueous suspension.

#### **S1.4 Fluorescent test strips test**

Filter papers with the size of  $5 \times 0.5 \text{ cm}^2$  were soaked in the aqueous suspension of complex **6** for 30 minutes, and then the filter paper strip was taken out and dried in an oven at  $70^\circ\text{C}$  for 1 hour to form the fluorescent strips of complex **6**. Then the strips were immersed in different ions or biomolecules with different concentrations for 1 min.

#### **S1.5 Fluorescent sensing film**

Weigh 200 mg of agar powder and 50 mg of complex **6** into a 25 mL beaker, and then add 10 mL of distilled water. After heating it at  $90^\circ\text{C}$  for 10 min, and taking 1 mL of it in a mold of  $3 \times 3 \times 0.3 \text{ cm}^3$ , and then standing for 10 min to form a fluorescent sensing film.

#### **S1.6 Fluorescence quantum yield measurements**

The SC-30 integrating sphere module is used for the measurement of absolute photoluminescence quantum yields<sup>S3</sup>. For the measurement of solid samples, the blank device that comes with the instrument. Firstly, xenon lamp and red PMT-900

Sphere were chose as the source light path and detector light path. Secondly, the emission scan setup was same as that of the standard procedure of solid-state fluorescence emission spectra. Then the fluorescence emission spectrum of blank was recorded under excitation wavelength of sample. Herein, the excitation wavelength is 294 nm. The solid sample for **6** and recovered **6** after immersion with Cr(VI) and TCs were dried fully. Then, 2 mg of fully ground solid samples were put in sample cell and recorded the data. For the quantum yield calculation, the 'direct only' was selected to be the measurements type and 'standard analysis' was chose as the analysis type.

**Table S1** Crystal data and structure refinement for complexes **1 – 6**

| <b>Complex</b>           | <b>1</b>                                            | <b>2</b>                                             | <b>3</b>                                            | <b>4</b>                                             | <b>5</b>                                            | <b>6</b>                                             |
|--------------------------|-----------------------------------------------------|------------------------------------------------------|-----------------------------------------------------|------------------------------------------------------|-----------------------------------------------------|------------------------------------------------------|
| <b>CCDC</b>              | 2236703                                             | 2236704                                              | 2236705                                             | 2236706                                              | 2236707                                             | 2236708                                              |
| <b>Formula</b>           | C <sub>12</sub> H <sub>13</sub> CeClNO <sub>7</sub> | C <sub>12</sub> H <sub>13</sub> ClNO <sub>7</sub> Pr | C <sub>12</sub> H <sub>13</sub> ClNNdO <sub>7</sub> | C <sub>12</sub> H <sub>13</sub> ClNO <sub>7</sub> Sm | C <sub>12</sub> H <sub>13</sub> ClEuNO <sub>7</sub> | C <sub>12</sub> H <sub>13</sub> ClNO <sub>7</sub> Tb |
| <b>Formula weight</b>    | 458.80                                              | 459.59                                               | 462.92                                              | 469.03                                               | 470.64                                              | 477.60                                               |
| <b>Crystal system</b>    | Monoclinic                                          | Monoclinic                                           | Monoclinic                                          | Monoclinic                                           | Monoclinic                                          | Monoclinic                                           |
| <b>Space group</b>       | <i>P</i> <sub>2</sub> <sub>1</sub> / <i>c</i>       | <i>P</i> <sub>2</sub> <sub>1</sub> / <i>c</i>        | <i>P</i> <sub>2</sub> <sub>1</sub> / <i>c</i>       | <i>P</i> <sub>2</sub> <sub>1</sub> / <i>c</i>        | <i>P</i> <sub>2</sub> <sub>1</sub> / <i>c</i>       | <i>P</i> <sub>2</sub> <sub>1</sub> / <i>c</i>        |
| <b>T / K</b>             | 298 (2)                                             | 298 (2)                                              | 298 (2)                                             | 298 (2)                                              | 298 (2)                                             | 298 (2)                                              |
| <b>a / Å</b>             | 14.424 (5)                                          | 14.368 (19)                                          | 14.441 (6)                                          | 14.3665 (16)                                         | 14.365 (4)                                          | 14.365 (6)                                           |
| <b>b / Å</b>             | 12.494 (4)                                          | 12.445 (18)                                          | 12.511 (5)                                          | 12.3921 (13)                                         | 12.400 (4)                                          | 12.378 (5)                                           |
| <b>c / Å</b>             | 8.027 (3)                                           | 7.961 (14)                                           | 7.996 (3)                                           | 7.8827 (8)                                           | 7.874 (2)                                           | 7.859 (3)                                            |
| <b>β / °</b>             | 95.411 (8)                                          | 95.443(5)                                            | 95.595 (10)                                         | 95.556 (3)                                           | 95.572 (8)                                          | 95.858 (11)                                          |
| <b>V / Å<sup>3</sup></b> | 1440.1 (9)                                          | 1417.1 (4)                                           | 1437.8 (10)                                         | 1396.8 (3)                                           | 1395.9 (7)                                          | 1390.0 (9)                                           |
| <b>Z</b>                 | 4                                                   | 4                                                    | 4                                                   | 4                                                    | 4                                                   | 4                                                    |
| <b>F (000)</b>           | 892                                                 | 896                                                  | 900                                                 | 908                                                  | 912                                                 | 920                                                  |
| <b>Goof</b>              | 1.02                                                | 1.03                                                 | 1.05                                                | 1.03                                                 | 1.03                                                | 1.07                                                 |
| <b>R<sub>1</sub></b>     | 0.035                                               | 0.037                                                | 0.069                                               | 0.028                                                | 0.043                                               | 0.058                                                |
| <b>ωR<sub>2</sub></b>    | 0.089                                               | 0.081                                                | 0.166                                               | 0.068                                                | 0.107                                               | 0.135                                                |

**Table S2** Selected bond lengths (Å) and bond angles (°) for complexes **1 – 6**

| <b>Complex 1</b> |                  |             |                  |             |                  |
|------------------|------------------|-------------|------------------|-------------|------------------|
| <b>Bond</b>      | <b>Dist. (Å)</b> | <b>Bond</b> | <b>Dist. (Å)</b> | <b>Bond</b> | <b>Dist. (Å)</b> |



|                                         |             |                                         |             |                                        |             |
|-----------------------------------------|-------------|-----------------------------------------|-------------|----------------------------------------|-------------|
| Ce1—O1                                  | 2.452 (4)   | Ce1—O7                                  | 2.520 (3)   | Ce1—O3 <sup>v</sup>                    | 2.582 (4)   |
| Ce1—O6 <sup>i</sup>                     | 2.470 (3)   | Ce1—O5 <sup>iii</sup>                   | 2.526 (4)   | Ce1—O4 <sup>v</sup>                    | 2.611 (4)   |
| Ce1—O4 <sup>ii</sup>                    | 2.489 (3)   | Ce1—O2 <sup>iv</sup>                    | 2.550 (4)   | Ce1—O5 <sup>i</sup>                    | 2.722 (4)   |
| Ce1⋯Ce1 <sup>vi</sup>                   | 4.196 (1)   |                                         |             |                                        |             |
| <b>Angle</b>                            | <b>(°)</b>  | <b>Angle</b>                            | <b>(°)</b>  | <b>Angle</b>                           | <b>(°)</b>  |
| O1—Ce1—O6 <sup>i</sup>                  | 75.15 (13)  | O1—Ce1—O2 <sup>iv</sup>                 | 140.83 (13) | O2 <sup>iv</sup> —Ce1—O3 <sup>v</sup>  | 109.91 (14) |
| O1—Ce1—O4 <sup>ii</sup>                 | 141.36 (13) | O6 <sup>i</sup> —Ce1—O2 <sup>iv</sup>   | 112.50 (13) | O1—Ce1—O4 <sup>v</sup>                 | 73.22 (12)  |
| O6 <sup>i</sup> —Ce1—O4 <sup>ii</sup>   | 115.02 (12) | O4 <sup>ii</sup> —Ce1—O2 <sup>iv</sup>  | 72.56 (12)  | O6 <sup>i</sup> —Ce1—O4 <sup>v</sup>   | 141.12 (11) |
| O1—Ce1—O7                               | 75.82 (14)  | O7—Ce1—O2 <sup>iv</sup>                 | 143.28 (13) | O4 <sup>ii</sup> —Ce1—O4 <sup>v</sup>  | 103.80 (11) |
| O6 <sup>i</sup> —Ce1—O7                 | 72.58 (13)  | O5 <sup>iii</sup> —Ce1—O2 <sup>iv</sup> | 71.99 (12)  | O7—Ce1—O4 <sup>v</sup>                 | 119.65 (12) |
| O4 <sup>ii</sup> —Ce1—O7                | 72.74 (13)  | O1—Ce1—O3 <sup>v</sup>                  | 73.75 (15)  | O5 <sup>iii</sup> —Ce1—O4 <sup>v</sup> | 71.75 (11)  |
| O1—Ce1—O5 <sup>iii</sup>                | 72.58 (13)  | O6 <sup>i</sup> —Ce1—O3 <sup>v</sup>    | 137.52 (14) | O2 <sup>iv</sup> —Ce1—O4 <sup>v</sup>  | 80.30 (12)  |
| O6 <sup>i</sup> —Ce1—O5 <sup>iii</sup>  | 77.67 (12)  | O4 <sup>ii</sup> —Ce1—O3 <sup>v</sup>   | 75.69 (13)  | O3 <sup>v</sup> —Ce1—O4 <sup>v</sup>   | 49.91 (12)  |
| O4 <sup>ii</sup> —Ce1—O5 <sup>iii</sup> | 144.50 (12) | O7—Ce1—O3 <sup>v</sup>                  | 72.27 (13)  | O1—Ce1—O5 <sup>i</sup>                 | 123.74 (12) |
| O7—Ce1—O5 <sup>iii</sup>                | 141.00 (12) | O5 <sup>iii</sup> —Ce1—O3 <sup>v</sup>  | 118.56 (12) | O6 <sup>i</sup> —Ce1—O5 <sup>i</sup>   | 49.64 (11)  |

Symmetry codes: (i)  $-x+1, -y+1, -z+2$ ; (ii)  $-x, y+1/2, -z+3/2$ ; (iii)  $-x+1, y+1/2, -z+3/2$ ; (iv)  $x, -y+3/2, z+1/2$ ; (v)  $-x, -y+1, -z+1$ , (vi)  $x, -y+3/2, z-1/2$

#### Complex 2

|                         |             |                                       |             |                                       |             |
|-------------------------|-------------|---------------------------------------|-------------|---------------------------------------|-------------|
| <b>Bond</b>             | <b>Å</b>    | <b>Bond</b>                           | <b>Å</b>    | <b>Bond</b>                           | <b>Å</b>    |
| Pr1—O1                  | 2.429 (4)   | Pr1—O7                                | 2.498 (4)   | Pr1—O3 <sup>v</sup>                   | 2.560 (4)   |
| Pr1—O6 <sup>i</sup>     | 2.444 (4)   | Pr1—O5 <sup>iii</sup>                 | 2.503 (4)   | Pr1—O4 <sup>v</sup>                   | 2.579 (4)   |
| Pr1—O4 <sup>ii</sup>    | 2.469 (3)   | Pr1—O2 <sup>iv</sup>                  | 2.531 (4)   | Pr1—O5 <sup>i</sup>                   | 2.698 (4)   |
| Pr1⋯Pr1 <sup>vi</sup>   | 4.162 (8)   |                                       |             |                                       |             |
| <b>Angle</b>            | <b>(°)</b>  | <b>Angle</b>                          | <b>(°)</b>  | <b>Angle</b>                          | <b>(°)</b>  |
| O1—Pr1—O6 <sup>i</sup>  | 74.72 (14)  | O1—Pr1—O2 <sup>iv</sup>               | 141.33 (13) | O2 <sup>iv</sup> —Pr1—O3 <sup>v</sup> | 110.14 (15) |
| O1—Pr1—O4 <sup>ii</sup> | 141.09 (13) | O6 <sup>i</sup> —Pr1—O2 <sup>iv</sup> | 112.46 (13) | O1—Pr1—O4 <sup>v</sup>                | 73.64 (13)  |

|                                         |             |                                         |             |                                        |             |
|-----------------------------------------|-------------|-----------------------------------------|-------------|----------------------------------------|-------------|
| O6 <sup>i</sup> —Pr1—O4 <sup>ii</sup>   | 115.04 (12) | O4 <sup>ii</sup> —Pr1—O2 <sup>iv</sup>  | 72.62 (12)  | O6 <sup>i</sup> —Pr1—O4 <sup>v</sup>   | 140.81 (12) |
| O1—Pr1—O7                               | 75.50 (14)  | O7—Pr1—O2 <sup>iv</sup>                 | 143.11 (13) | O4 <sup>ii</sup> —Pr1—O4 <sup>v</sup>  | 104.10 (12) |
| O6 <sup>i</sup> —Pr1—O7                 | 72.69 (13)  | O5 <sup>iii</sup> —Pr1—O2 <sup>iv</sup> | 72.23 (12)  | O7—Pr1—O4 <sup>v</sup>                 | 119.91 (13) |
| O4 <sup>ii</sup> —Pr1—O7                | 72.52 (13)  | O1—Pr1—O3 <sup>v</sup>                  | 73.75 (16)  | O5 <sup>iii</sup> —Pr1—O4 <sup>v</sup> | 71.63 (11)  |
| O1—Pr1—O5 <sup>iii</sup>                | 72.72 (13)  | O6 <sup>i</sup> —Pr1—O3 <sup>v</sup>    | 137.34 (15) | O2 <sup>iv</sup> —Pr1—O4 <sup>v</sup>  | 80.27 (12)  |
| O6 <sup>i</sup> —Pr1—O5 <sup>iii</sup>  | 77.34 (12)  | O4 <sup>ii</sup> —Pr1—O3 <sup>v</sup>   | 75.77 (13)  | O3 <sup>v</sup> —Pr1—O4 <sup>v</sup>   | 50.28 (12)  |
| O4 <sup>ii</sup> —Pr1—O5 <sup>iii</sup> | 144.79 (12) | O7—Pr1—O3 <sup>v</sup>                  | 72.13 (14)  | O1—Pr1—O5 <sup>i</sup>                 | 123.70 (12) |
| O7—Pr1—O5 <sup>iii</sup>                | 140.86 (13) | O5 <sup>iii</sup> —Pr1—O3 <sup>v</sup>  | 118.70 (13) | O6 <sup>i</sup> —Pr1—O5 <sup>i</sup>   | 50.09 (11)  |

Symmetry codes: (i)  $-x+1, -y+1, -z+2$ ; (ii)  $-x, y+1/2, -z+3/2$ ; (iii)  $-x+1, y+1/2, -z+3/2$ ; (iv)  $x, -y+3/2, z+1/2$ ; (v)  $-x, -y+1, -z+1$ , (vi)  $x, -y+3/2, z-1/2$

### Complex 3

| Bond                                    | Å         | Bond                                    | Å         | Bond                                   | Å         |
|-----------------------------------------|-----------|-----------------------------------------|-----------|----------------------------------------|-----------|
| Nd1—O1                                  | 2.426 (9) | Nd1—O7                                  | 2.495 (9) | Nd1—O3 <sup>v</sup>                    | 2.566 (9) |
| Nd1—O6 <sup>i</sup>                     | 2.449 (8) | Nd1—O5 <sup>iii</sup>                   | 2.518 (9) | Nd1—O4 <sup>v</sup>                    | 2.586 (8) |
| Nd1—O4 <sup>ii</sup>                    | 2.476 (9) | Nd1—O2 <sup>iv</sup>                    | 2.542 (9) | Nd1—O5 <sup>i</sup>                    | 2.709 (9) |
| Nd1···Nd1 <sup>vi</sup>                 | 4.179 (2) |                                         |           |                                        |           |
| Angle                                   | (°)       | Angle                                   | (°)       | Angle                                  | (°)       |
| O1—Nd1—O6 <sup>i</sup>                  | 74.6 (3)  | O1—Nd1—O2 <sup>iv</sup>                 | 141.8 (3) | O2 <sup>iv</sup> —Nd1—O3 <sup>v</sup>  | 110.5 (3) |
| O1—Nd1—O4 <sup>ii</sup>                 | 140.8 (3) | O6 <sup>i</sup> —Nd1—O2 <sup>iv</sup>   | 112.1 (3) | O1—Nd1—O4 <sup>v</sup>                 | 73.8 (3)  |
| O6 <sup>i</sup> —Nd1—O4 <sup>ii</sup>   | 114.8 (3) | O4 <sup>ii</sup> —Nd1—O2 <sup>iv</sup>  | 72.7 (3)  | O6 <sup>i</sup> —Nd1—O4 <sup>v</sup>   | 140.8 (3) |
| O1—Nd1—O7                               | 75.5 (3)  | O7—Nd1—O2 <sup>iv</sup>                 | 142.7 (3) | O4 <sup>ii</sup> —Nd1—O4 <sup>v</sup>  | 104.3 (3) |
| O6 <sup>i</sup> —Nd1—O7                 | 73.0 (3)  | O5 <sup>iii</sup> —Nd1—O2 <sup>iv</sup> | 72.5 (3)  | O7—Nd1—O4 <sup>v</sup>                 | 119.8 (3) |
| O4 <sup>ii</sup> —Nd1—O7                | 72.0 (3)  | O1—Nd1—O3 <sup>v</sup>                  | 73.7 (3)  | O5 <sup>iii</sup> —Nd1—O4 <sup>v</sup> | 71.6 (3)  |
| O1—Nd1—O5 <sup>iii</sup>                | 72.6 (3)  | O6 <sup>i</sup> —Nd1—O3 <sup>v</sup>    | 137.3 (3) | O2 <sup>iv</sup> —Nd1—O4 <sup>v</sup>  | 80.7 (3)  |
| O6 <sup>i</sup> —Nd1—O5 <sup>iii</sup>  | 77.3 (3)  | O4 <sup>ii</sup> —Nd1—O3 <sup>v</sup>   | 75.9 (3)  | O3 <sup>v</sup> —Nd1—O4 <sup>v</sup>   | 50.3 (3)  |
| O4 <sup>ii</sup> —Nd1—O5 <sup>iii</sup> | 145.3 (3) | O7—Nd1—O3 <sup>v</sup>                  | 72.0 (3)  | O1—Nd1—O5 <sup>i</sup>                 | 123.6 (3) |

|                          |           |                                        |           |                                      |          |
|--------------------------|-----------|----------------------------------------|-----------|--------------------------------------|----------|
| O7—Nd1—O5 <sup>iii</sup> | 140.9 (3) | O5 <sup>iii</sup> —Nd1—O3 <sup>v</sup> | 118.5 (3) | O6 <sup>i</sup> —Nd1—O5 <sup>i</sup> | 50.1 (3) |
|--------------------------|-----------|----------------------------------------|-----------|--------------------------------------|----------|

Symmetry codes: (i)  $-x+1, -y+1, -z+2$ ; (ii)  $-x, y+1/2, -z+3/2$ ; (iii)  $-x+1, y+1/2, -z+3/2$ ; (iv)  $x, -y+3/2, z+1/2$ ; (v)  $-x, -y+1, -z+1$ , (vi)  $x, -y+3/2, z-1/2$

#### Complex 4

| Bond                                    | Dist. (Å)   | Bond                                    | Dist. (Å)   | Bond                                   | Dist. (Å)   |
|-----------------------------------------|-------------|-----------------------------------------|-------------|----------------------------------------|-------------|
| Sm1—O1                                  | 2.387 (3)   | Sm1—O7                                  | 2.449 (3)   | Sm1—O3 <sup>v</sup>                    | 2.515 (3)   |
| Sm1—O6 <sup>i</sup>                     | 2.405 (3)   | Sm1—O5 <sup>iii</sup>                   | 2.468 (3)   | Sm1—O4 <sup>v</sup>                    | 2.540 (3)   |
| Sm1—O4 <sup>ii</sup>                    | 2.433 (3)   | Sm1—O2 <sup>iv</sup>                    | 2.480 (3)   | Sm1—O5 <sup>i</sup>                    | 2.675 (3)   |
| Sm1···Sm1 <sup>vi</sup>                 | 4.122 (5)   |                                         |             |                                        |             |
| Angle                                   | (°)         | Angle                                   | (°)         | Angle                                  | (°)         |
| O1—Sm1—O6 <sup>i</sup>                  | 74.62 (11)  | O1—Sm1—O2 <sup>iv</sup>                 | 141.50 (11) | O2 <sup>iv</sup> —Sm1—O3 <sup>v</sup>  | 110.46 (12) |
| O1—Sm1—O4 <sup>ii</sup>                 | 140.98 (11) | O6 <sup>i</sup> —Sm1—O2 <sup>iv</sup>   | 112.22 (11) | O1—Sm1—O4 <sup>v</sup>                 | 73.80 (10)  |
| O6 <sup>i</sup> —Sm1—O4 <sup>ii</sup>   | 114.83 (10) | O4 <sup>ii</sup> —Sm1—O2 <sup>iv</sup>  | 72.81 (10)  | O6 <sup>i</sup> —Sm1—O4 <sup>v</sup>   | 140.33 (10) |
| O1—Sm1—O7                               | 75.56 (11)  | O7—Sm1—O2 <sup>iv</sup>                 | 142.89 (11) | O4 <sup>ii</sup> —Sm1—O4 <sup>v</sup>  | 104.82 (9)  |
| O6 <sup>i</sup> —Sm1—O7                 | 73.03 (11)  | O5 <sup>iii</sup> —Sm1—O2 <sup>iv</sup> | 72.26 (11)  | O7—Sm1—O4 <sup>v</sup>                 | 120.45 (10) |
| O4 <sup>ii</sup> —Sm1—O7                | 72.06 (10)  | O1—Sm1—O3 <sup>v</sup>                  | 73.68 (13)  | O5 <sup>iii</sup> —Sm1—O4 <sup>v</sup> | 71.25 (10)  |
| O1—Sm1—O5 <sup>iii</sup>                | 72.82 (11)  | O6 <sup>i</sup> —Sm1—O3 <sup>v</sup>    | 137.26 (13) | O2 <sup>iv</sup> —Sm1—O4 <sup>v</sup>  | 80.07 (10)  |
| O6 <sup>i</sup> —Sm1—O5 <sup>iii</sup>  | 76.96 (11)  | O4 <sup>ii</sup> —Sm1—O3 <sup>v</sup>   | 75.98 (11)  | O3 <sup>v</sup> —Sm1—O4 <sup>v</sup>   | 51.06 (10)  |
| O4 <sup>ii</sup> —Sm1—O5 <sup>iii</sup> | 145.00 (11) | O7—Sm1—O3 <sup>v</sup>                  | 71.85 (11)  | O1—Sm1—O5 <sup>i</sup>                 | 123.98 (10) |
| O7—Sm1—O5 <sup>iii</sup>                | 140.96 (11) | O5 <sup>iii</sup> —Sm1—O3 <sup>v</sup>  | 118.98 (11) | O6 <sup>i</sup> —Sm1—O5 <sup>i</sup>   | 50.55 (10)  |

Symmetry codes: (i)  $-x+1, -y+1, -z+2$ ; (ii)  $-x, y+1/2, -z+3/2$ ; (iii)  $-x+1, y+1/2, -z+3/2$ ; (iv)  $x, -y+3/2, z+1/2$ ; (v)  $-x, -y+1, -z+1$ , (vi)  $x, -y+3/2, z-1/2$

#### Complex 5

| Bond                | Dist. (Å) | Bond                  | Dist. (Å) | Bond                | Dist. (Å) |
|---------------------|-----------|-----------------------|-----------|---------------------|-----------|
| Eu1—O1              | 2.376 (5) | Eu1—O7                | 2.441 (5) | Eu1—O3 <sup>v</sup> | 2.510 (6) |
| Eu1—O6 <sup>i</sup> | 2.394 (5) | Eu1—O5 <sup>iii</sup> | 2.461 (6) | Eu1—O4 <sup>v</sup> | 2.546 (5) |

|                                         |             |                                         |             |                                        |             |
|-----------------------------------------|-------------|-----------------------------------------|-------------|----------------------------------------|-------------|
| Eu1—O4 <sup>ii</sup>                    | 2.417 (5)   | Eu1—O2 <sup>iv</sup>                    | 2.468 (6)   | Eu1—O5 <sup>i</sup>                    | 2.678 (6)   |
| Eu1⋯Eu1 <sup>vi</sup>                   | 4.117 (1)   |                                         |             |                                        |             |
| <b>Angle</b>                            | <b>(°)</b>  | <b>Angle</b>                            | <b>(°)</b>  | <b>Angle</b>                           | <b>(°)</b>  |
| O1—Eu1—O6 <sup>i</sup>                  | 74.6 (2)    | O1—Eu1—O2 <sup>iv</sup>                 | 141.76 (19) | O2 <sup>iv</sup> —Eu1—O3 <sup>v</sup>  | 110.9 (2)   |
| O1—Eu1—O4 <sup>ii</sup>                 | 140.7 (19)  | O6 <sup>i</sup> —Eu1—O2 <sup>iv</sup>   | 111.9 (2)   | O1—Eu1—O4 <sup>v</sup>                 | 73.70 (18)  |
| O6 <sup>i</sup> —Eu1—O4 <sup>ii</sup>   | 114.91 (18) | O4 <sup>ii</sup> —Eu1—O2 <sup>iv</sup>  | 72.82 (17)  | O6 <sup>i</sup> —Eu1—O4 <sup>v</sup>   | 140.12 (18) |
| O1—Eu1—O7                               | 75.5 (2)    | O7—Eu1—O2 <sup>iv</sup>                 | 142.67 (18) | O4 <sup>ii</sup> —Eu1—O4 <sup>v</sup>  | 104.94 (16) |
| O6 <sup>i</sup> —Eu1—O7                 | 73.25 (19)  | O5 <sup>iii</sup> —Eu1—O2 <sup>iv</sup> | 72.03 (18)  | O7—Eu1—O4 <sup>v</sup>                 | 120.44 (18) |
| O4 <sup>ii</sup> —Eu1—O7                | 71.88 (18)  | O1—Eu1—O3 <sup>v</sup>                  | 73.4 (2)    | O5 <sup>iii</sup> —Eu1—O4 <sup>v</sup> | 71.07 (17)  |
| O1—Eu1—O5 <sup>iii</sup>                | 73.21 (19)  | O6 <sup>i</sup> —Eu1—O3 <sup>v</sup>    | 137.1 (2)   | O2 <sup>iv</sup> —Eu1—O4 <sup>v</sup>  | 80.36 (18)  |
| O6 <sup>i</sup> —Eu1—O5 <sup>iii</sup>  | 77.01 (19)  | O4 <sup>ii</sup> —Eu1—O3 <sup>v</sup>   | 76.0 (2)    | O3 <sup>v</sup> —Eu1—O4 <sup>v</sup>   | 51.30 (18)  |
| O4 <sup>ii</sup> —Eu1—O5 <sup>iii</sup> | 144.79 (18) | O7—Eu1—O3 <sup>v</sup>                  | 71.6 (2)    | O1—Eu1—O5 <sup>i</sup>                 | 123.96 (17) |
| O7—Eu1—O5 <sup>iii</sup>                | 141.36 (19) | O5 <sup>iii</sup> —Eu1—O3 <sup>v</sup>  | 119.09 (19) | O6 <sup>i</sup> —Eu1—O5 <sup>i</sup>   | 50.55 (18)  |

Symmetry codes: (i)  $-x+1, -y+1, -z+2$ ; (ii)  $-x, y+1/2, -z+3/2$ ; (iii)  $-x+1, y+1/2, -z+3/2$ ; (iv)  $x, -y+3/2, z+1/2$ ; (v)  $-x, -y+1, -z+1$ , (vi)  $x, -y+3/2, z-1/2$

#### Complex 6

| <b>Bond</b>             | <b>Dist. (Å)</b> | <b>Bond</b>                            | <b>Dist. (Å)</b> | <b>Bond</b>                           | <b>Dist. (Å)</b> |
|-------------------------|------------------|----------------------------------------|------------------|---------------------------------------|------------------|
| Tb1—O1                  | 2.358 (9)        | Tb1—O4 <sup>ii</sup>                   | 2.422 (9)        | Tb1—O3 <sup>v</sup>                   | 2.478 (10)       |
| Tb1—O6 <sup>i</sup>     | 2.358 (10)       | Tb1—O5 <sup>iii</sup>                  | 2.440 (10)       | Tb1—O4 <sup>v</sup>                   | 2.526 (9)        |
| Tb1—O7                  | 2.415 (9)        | Tb1—O2 <sup>iv</sup>                   | 2.445 (9)        | Tb1—O5 <sup>i</sup>                   | 2.696 (10)       |
| Tb1⋯Tb1 <sup>vi</sup>   | 4.110 (2)        |                                        |                  |                                       |                  |
| <b>Angle</b>            | <b>(°)</b>       | <b>Angle</b>                           | <b>(°)</b>       | <b>Angle</b>                          | <b>(°)</b>       |
| O1—Tb1—O6 <sup>i</sup>  | 74.5 (3)         | O1—Tb1—O2 <sup>iv</sup>                | 141.7 (3)        | O2 <sup>iv</sup> —Tb1—O3 <sup>v</sup> | 111.0 (4)        |
| O1—Tb1—O7               | 76.2 (3)         | O6 <sup>i</sup> —Tb1—O2 <sup>iv</sup>  | 111.9 (4)        | O1—Tb1—O4 <sup>v</sup>                | 73.9 (3)         |
| O6 <sup>i</sup> —Tb1—O7 | 73.3 (3)         | O7—Tb1—O2 <sup>iv</sup>                | 142.1 (3)        | O6 <sup>i</sup> —Tb1—O4 <sup>v</sup>  | 140.3 (3)        |
| O1—Tb1—O4 <sup>ii</sup> | 141.1 (3)        | O4 <sup>ii</sup> —Tb1—O2 <sup>iv</sup> | 72.8 (3)         | O7—Tb1—O4 <sup>v</sup>                | 120.8 (3)        |

|                                         |           |                                         |           |                                        |           |
|-----------------------------------------|-----------|-----------------------------------------|-----------|----------------------------------------|-----------|
| O6 <sup>i</sup> —Tb1—O4 <sup>ii</sup>   | 114.5 (3) | O5 <sup>iii</sup> —Tb1—O2 <sup>iv</sup> | 72.5 (3)  | O4 <sup>ii</sup> —Tb1—O4 <sup>v</sup>  | 105.2 (3) |
| O7—Tb1—O4 <sup>ii</sup>                 | 71.3 (3)  | O1—Tb1—O3 <sup>v</sup>                  | 73.5 (4)  | O5 <sup>iii</sup> —Tb1—O4 <sup>v</sup> | 71.6 (3)  |
| O1—Tb1—O5 <sup>iii</sup>                | 72.8 (3)  | O6 <sup>i</sup> —Tb1—O3 <sup>v</sup>    | 137.0 (4) | O2 <sup>iv</sup> —Tb1—O4 <sup>v</sup>  | 80.4 (3)  |
| O6 <sup>i</sup> —Tb1—O5 <sup>iii</sup>  | 76.5 (3)  | O7—Tb1—O3 <sup>v</sup>                  | 71.8 (3)  | O3 <sup>v</sup> —Tb1—O4 <sup>v</sup>   | 51.2 (3)  |
| O7—Tb1—O5 <sup>iii</sup>                | 141.2 (3) | O4 <sup>ii</sup> —Tb1—O3 <sup>v</sup>   | 76.4 (3)  | O1—Tb1—O5 <sup>i</sup>                 | 124.4 (3) |
| O4 <sup>ii</sup> —Tb1—O5 <sup>iii</sup> | 145.2 (3) | O5 <sup>iii</sup> —Tb1—O3 <sup>v</sup>  | 119.3 (3) | O6 <sup>i</sup> —Tb1—O5 <sup>i</sup>   | 51.0 (3)  |

Symmetry codes: (i)  $-x+1, -y+1, -z+2$ ; (ii)  $-x, y+1/2, -z+3/2$ ; (iii)  $-x+1, y+1/2, -z+3/2$ ; (iv)  $x, -y+3/2, z+1/2$ ; (v)  $-x, -y+1, -z+1$ , (vi)  $x, -y+3/2, z-1/2$

**Table S3** Weak interaction (Å and °) for complexes **1 – 6**

| Complex 1                 |      |       |           |         |
|---------------------------|------|-------|-----------|---------|
| D—H···A                   | D—H  | H···A | D···A     | D—H···A |
| O7—H7B···O3 <sup>ix</sup> | 0.83 | 2.36  | 3.101 (5) | 149     |
| O7—H7B···O2 <sup>ix</sup> | 0.83 | 2.59  | 3.106 (6) | 122     |
| O7—H7A···Cl1 <sup>x</sup> | 0.83 | 2.57  | 3.193 (4) | 133     |
| N1—H1B···Cl1              | 0.89 | 2.20  | 3.063 (4) | 163     |
| N1—H1A···Cl1 <sup>x</sup> | 0.89 | 2.44  | 3.252 (5) | 153     |

Symmetry codes: (ix)  $x, y, z+1$ ; (x)  $x, -y+1/2, z+1/2$ .

| Complex 2                  |      |       |           |         |
|----------------------------|------|-------|-----------|---------|
| D—H···A                    | D—H  | H···A | D···A     | D—H···A |
| O7—H7B···O2 <sup>x</sup>   | 0.83 | 2.57  | 3.078 (6) | 122     |
| O7—H7B···O3 <sup>x</sup>   | 0.83 | 2.36  | 3.089 (5) | 148     |
| O7—H7A···Cl1 <sup>ix</sup> | 0.82 | 2.55  | 3.175 (4) | 133     |
| N1—H1B···Cl1               | 0.89 | 2.20  | 3.060 (4) | 163     |
| N1—H1A···Cl1 <sup>ix</sup> | 0.89 | 2.43  | 3.242 (5) | 153     |

Symmetry codes: (ix)  $x, -y+1/2, z+1/2$ ; (x)  $x, y, z+1$ .

| Complex 3 |  |  |  |  |
|-----------|--|--|--|--|
|-----------|--|--|--|--|

| D—H···A                   | D—H  | H···A | D···A      | D—H···A |
|---------------------------|------|-------|------------|---------|
| O7—H7B···O3 <sup>ix</sup> | 0.83 | 2.40  | 3.136 (13) | 148     |
| O7—H7B···O2 <sup>ix</sup> | 0.83 | 2.60  | 3.113 (13) | 122     |
| O7—H7A···Cl1 <sup>x</sup> | 0.83 | 2.59  | 3.213 (10) | 133     |
| N1—H1A···Cl1              | 0.89 | 2.21  | 3.074 (11) | 165     |
| N1—H1B···Cl1 <sup>x</sup> | 0.89 | 2.44  | 3.263 (12) | 154     |

Symmetry codes: (ix)  $x, y, z+1$ ; (x)  $x, -y+1/2, z+1/2$ .

#### Complex 4

| D—H···A                    | D—H  | H···A | D···A     | D—H···A |
|----------------------------|------|-------|-----------|---------|
| O7—H7B···O3 <sup>x</sup>   | 0.82 | 2.39  | 3.105 (5) | 147     |
| O7—H7B···O2 <sup>x</sup>   | 0.82 | 2.53  | 3.039 (5) | 121     |
| O7—H7A···Cl1 <sup>ix</sup> | 0.82 | 2.56  | 3.175 (4) | 133     |
| N1—H1B···Cl1               | 0.89 | 2.19  | 3.058 (3) | 164     |
| N1—H1A···Cl1 <sup>ix</sup> | 0.89 | 2.41  | 3.226 (4) | 152     |

Symmetry codes: (ix)  $x, -y+1/2, z+1/2$ ; (x)  $x, y, z+1$ .

#### Complex 5

| D—H···A                    | D—H  | H···A | D···A     | D—H···A |
|----------------------------|------|-------|-----------|---------|
| O7—H7B···O3 <sup>i</sup>   | 0.82 | 2.39  | 3.105 (8) | 147     |
| O7—H7B···O2 <sup>i</sup>   | 0.82 | 2.55  | 3.051 (8) | 121     |
| O7—H7A···Cl1 <sup>ii</sup> | 0.82 | 2.57  | 3.182 (6) | 133     |
| N1—H1B···Cl1               | 0.89 | 2.20  | 3.064 (6) | 164     |
| N1—H1A···Cl1 <sup>ii</sup> | 0.89 | 2.42  | 3.235 (7) | 153     |

Symmetry codes: (i)  $x, y, z+1$ ; (ii)  $x, -y+1/2, z+1/2$ .

#### Complex 6

| D—H···A                   | D—H  | H···A | D···A      | D—H···A |
|---------------------------|------|-------|------------|---------|
| O7—H7B···O3 <sup>ix</sup> | 0.82 | 2.42  | 3.131 (13) | 146     |
| O7—H7B···O2 <sup>ix</sup> | 0.82 | 2.54  | 3.046 (12) | 121     |
| O7—H7A···Cl1 <sup>x</sup> | 0.82 | 2.57  | 3.189 (10) | 133     |
| N1—H1A···Cl1              | 0.89 | 2.21  | 3.080 (10) | 164     |

Symmetry codes: (ix) *x*, *y*, *z*+1; (x) *x*, -*y*+1/2, *z*+1/2.**Table S4** Quantum yield results of complexes **1 – 6**

| Sample        | <b>1</b> (440 nm) | <b>2</b> (420 nm) | <b>3</b> (420 nm) |
|---------------|-------------------|-------------------|-------------------|
| Quantum yield | 0.1%              | 0.4%              | 0.4%              |
| Sample        | <b>4</b> (428 nm) | <b>5</b> (613 nm) | <b>6</b> (543 nm) |
| Quantum yield | 0.8%              | 10.1%             | 31.7%             |

**Table S5** Comparison of various complex sensors for detecting Cr<sub>2</sub>O<sub>7</sub><sup>2-</sup>, CrO<sub>4</sub><sup>2-</sup>, CTC or TC

| No.       | Complex                                                                                                                                | Analyte                                         | Detection range  | LOD            | Media                  | Ref.             |
|-----------|----------------------------------------------------------------------------------------------------------------------------------------|-------------------------------------------------|------------------|----------------|------------------------|------------------|
| <b>1</b>  | <b>Complex 6</b>                                                                                                                       | <b>Cr<sub>2</sub>O<sub>7</sub><sup>2-</sup></b> | <b>0–0.95 μM</b> | <b>3.66 nM</b> | <b>H<sub>2</sub>O</b>  | <b>This work</b> |
| 2         | HBU-20                                                                                                                                 | Cr <sub>2</sub> O <sub>7</sub> <sup>2-</sup>    | --               | 8.9 nM         | H <sub>2</sub> O       | S4               |
| 3         | {Tb(cpon)(Hcpon)(H <sub>2</sub> O) <sub>3</sub> } <sub>n</sub>                                                                         | Cr <sub>2</sub> O <sub>7</sub> <sup>2-</sup>    | 0–100 μM         | 0.25 μM        | H <sub>2</sub> O       | S5               |
| 4         | Tb <sub>0.5</sub> Y <sub>0.5</sub> -MOF                                                                                                | Cr <sub>2</sub> O <sub>7</sub> <sup>2-</sup>    | 1–1000 μM        | 0.36 μM        | H <sub>2</sub> O       | S6               |
| 5         | [Tb <sub>2</sub> (pyia) <sub>3</sub> (phen) <sub>2</sub> (H <sub>2</sub> O)]·H <sub>2</sub> O                                          | Cr <sub>2</sub> O <sub>7</sub> <sup>2-</sup>    | --               | 0.53 μM        | H <sub>2</sub> O       | S7               |
| 6         | Eu <sub>0.075</sub> Tb <sub>0.925</sub> -MOF                                                                                           | Cr <sub>2</sub> O <sub>7</sub> <sup>2-</sup>    | 10–100 μM        | 0.872 μM       | H <sub>2</sub> O       | S8               |
| 7         | {[Tb(L)(DMF)(H <sub>2</sub> O)]} <sub>n</sub>                                                                                          | Cr <sub>2</sub> O <sub>7</sub> <sup>2-</sup>    | --               | 1.14 μM        | DMF                    | S9               |
| 8         | UiO-66-NH-BT                                                                                                                           | Cr <sub>2</sub> O <sub>7</sub> <sup>2-</sup>    | --               | 1.3 μM         | H <sub>2</sub> O       | S10              |
| 9         | [Tb(L)(HCOO)(H <sub>2</sub> O)] <sub>n</sub>                                                                                           | Cr <sub>2</sub> O <sub>7</sub> <sup>2-</sup>    | --               | 2.1 μM         | H <sub>2</sub> O       | S11              |
| 10        | USTS-7                                                                                                                                 | Cr <sub>2</sub> O <sub>7</sub> <sup>2-</sup>    | 0.01–0.5 μM      | 2.2 μM         | DMF                    | S12              |
| 11        | CUST-604                                                                                                                               | Cr <sub>2</sub> O <sub>7</sub> <sup>2-</sup>    | 100–250 μM       | 2.29 μM        | DMF                    | S13              |
| 12        | [Zn <sub>3</sub> Eu <sub>2</sub> (TTHA) <sub>2</sub> (H <sub>2</sub> O) <sub>6</sub> ]·6H <sub>2</sub> O                               | Cr <sub>2</sub> O <sub>7</sub> <sup>2-</sup>    | 0–260 μM         | 3.00 μM        | EtOH                   | S14              |
| 13        | CUST-603                                                                                                                               | Cr <sub>2</sub> O <sub>7</sub> <sup>2-</sup>    | 0–300 μM         | 3.86 μM        | DMF                    | S13              |
| 14        | CUST-602                                                                                                                               | Cr <sub>2</sub> O <sub>7</sub> <sup>2-</sup>    | 0–250 μM         | 5.86 μM        | DMF                    | S13              |
| 15        | CUST-601                                                                                                                               | Cr <sub>2</sub> O <sub>7</sub> <sup>2-</sup>    | 60–300 μM        | 10.08 μM       | DMF                    | S13              |
| 16        | {[Zn <sub>6</sub> Cl <sub>6</sub> (2,2'-dbpt) <sub>3</sub> ]·4.5H <sub>2</sub> O} <sub>n</sub>                                         | Cr <sub>2</sub> O <sub>7</sub> <sup>2-</sup>    | --               | 13.64 μM       | DMF : H <sub>2</sub> O | S15              |
| 17        | CUST-605                                                                                                                               | Cr <sub>2</sub> O <sub>7</sub> <sup>2-</sup>    | 60–350 μM        | 21.6 μM        | DMF                    | S13              |
| 18        | {[TbL(H <sub>2</sub> O)]·2H <sub>2</sub> O} <sub>n</sub>                                                                               | Cr <sub>2</sub> O <sub>7</sub> <sup>2-</sup>    | --               | 25.3 μM        | H <sub>2</sub> O       | S16              |
| 19        | [Tb(ppda)(npdc) <sub>0.5</sub> (H <sub>2</sub> O) <sub>2</sub> ] <sub>n</sub>                                                          | Cr <sub>2</sub> O <sub>7</sub> <sup>2-</sup>    | --               | 60 μM          | H <sub>2</sub> O       | S17              |
| 20        | {[Cd(L)(bpe) <sub>0.5</sub> ]·H <sub>2</sub> O} <sub>n</sub>                                                                           | Cr <sub>2</sub> O <sub>7</sub> <sup>2-</sup>    | --               | 78.9 μM        | H <sub>2</sub> O       | S18              |
| <b>21</b> | <b>Complex 6</b>                                                                                                                       | <b>CrO<sub>4</sub><sup>2-</sup></b>             | <b>0–1.45 μM</b> | <b>5.35 nM</b> | <b>H<sub>2</sub>O</b>  | <b>This work</b> |
| 22        | [Tb <sub>2</sub> (μ <sub>3</sub> -L) <sub>2</sub> (μ <sub>4</sub> -L)(H <sub>2</sub> O) <sub>3</sub> ] <sub>n</sub> ·nH <sub>2</sub> O | CrO <sub>4</sub> <sup>2-</sup>                  | 0–1.5 μM         | 40.6 nM        | H <sub>2</sub> O       | S19              |
| 23        | HBU-20                                                                                                                                 | CrO <sub>4</sub> <sup>2-</sup>                  | --               | 65 nM          | H <sub>2</sub> O       | S4               |
| 24        | UiO-66-NH-BT                                                                                                                           | CrO <sub>4</sub> <sup>2-</sup>                  | --               | 0.411 μM       | H <sub>2</sub> O       | S10              |
| 25        | [Tb(L)(HCOO)(H <sub>2</sub> O)] <sub>n</sub>                                                                                           | CrO <sub>4</sub> <sup>2-</sup>                  | --               | 1.8 μM         | H <sub>2</sub> O       | S11              |

|    |                                                                                  |                     |                                      |                                      |                                        |                  |
|----|----------------------------------------------------------------------------------|---------------------|--------------------------------------|--------------------------------------|----------------------------------------|------------------|
| 26 | $\{[\text{Zn}_6\text{Cl}_6(2,2'\text{-dbpt})_3] \cdot 4.5\text{H}_2\text{O}\}_n$ | $\text{CrO}_4^{2-}$ | --                                   | 12.33 $\mu\text{M}$                  | DMF : $\text{H}_2\text{O}$             | S15              |
| 27 | $\{[\text{Cd}(\text{L})(\text{bpe})_{0.5}] \cdot \text{H}_2\text{O}\}_n$         | $\text{CrO}_4^{2-}$ | --                                   | 92.1 $\mu\text{M}$                   | $\text{H}_2\text{O}$                   | S18              |
| 18 | $\text{gC}_3\text{N}_4\text{-CdS}$                                               | TC                  | 0.01–0.25 $\mu\text{M}$              | 5.3 nM                               | $\text{Na}_2\text{SO}_4$               | S20              |
| 19 | Atta-CDs-Eu                                                                      | TC                  | 0–20 $\mu\text{M}$                   | 8.7 nM                               | $\text{H}_2\text{O}$                   | S21              |
| 20 | Laponite-Eu-Cit                                                                  | TC                  | 0–7 $\mu\text{M}$                    | 9.5 nM                               | $\text{H}_2\text{O}$                   | S22              |
| 21 | $[\text{Cd}(\text{L})(\text{SA})]_n$                                             | TC                  | 0–0.5 $\mu\text{M}$                  | 33 nM                                | $\text{H}_2\text{O}$                   | S23              |
| 22 | Eu-MOF                                                                           | TC                  | 0–140 $\mu\text{M}$                  | 39.8 nM                              | $\text{H}_2\text{O}$                   | S24              |
| 23 | $[\text{Cd}(\text{L})(\text{chdc}) \cdot (\text{H}_2\text{O})]_n$                | TC                  | 0–1.7 $\mu\text{M}$                  | 76 nM                                | $\text{H}_2\text{O}$                   | S23              |
| 24 | $\text{Eu}^{3+}/\text{NH}_2\text{-MIL-53(Al)}$                                   | TC                  | 0.5–60 $\mu\text{M}$                 | 0.16 $\mu\text{M}$                   | Tris–HCl                               | S25              |
| 25 | <b>Complex 6</b>                                                                 | <b>TC</b>           | <b>0–40 <math>\mu\text{M}</math></b> | <b>0.24 <math>\mu\text{M}</math></b> | <b><math>\text{H}_2\text{O}</math></b> | <b>This work</b> |
| 26 | In-sbdc                                                                          | TC                  | --                                   | 0.28 $\mu\text{M}$                   | Tris–HCl                               | S26              |
| 27 | Ag NCs                                                                           | TC                  | 1.12–230 $\mu\text{M}$               | 0.47 $\mu\text{M}$                   | BR buffer                              | S27              |
| 28 | $\text{NH}_2\text{-MIL-53(Al)}$                                                  | TC                  | 1.5–70 $\mu\text{M}$                 | 0.92 $\mu\text{M}$                   | Tris–HCl                               | S25              |
| 29 | ND-MS/GCE                                                                        | TC                  | 5–180 $\mu\text{M}$                  | 2 $\mu\text{M}$                      | PBS buffer                             | S28              |
| 30 | JLUE-MOGs                                                                        | CTC                 | --                                   | 79 nM                                | $\text{H}_2\text{O}$                   | S29              |
| 31 | Tb-L1                                                                            | CTC                 | --                                   | 83 nM                                | $\text{H}_2\text{O}$                   | S30              |
| 32 | $\text{CuNCs@TA}$                                                                | CTC                 | 0.5–200 $\mu\text{M}$                | 84 nM                                | $\text{H}_2\text{O}$                   | S31              |
| 33 | <b>Complex 6</b>                                                                 | <b>CTC</b>          | <b>0–25 <math>\mu\text{M}</math></b> | <b>0.25 <math>\mu\text{M}</math></b> | <b><math>\text{H}_2\text{O}</math></b> | <b>This work</b> |
| 34 | N-CDs                                                                            | CTC                 | 5–100 $\mu\text{M}$                  | 0.254 $\mu\text{M}$                  | $\text{H}_2\text{O}$                   | S32              |
| 35 | In-sbdc                                                                          | CTC                 | --                                   | 0.30 $\mu\text{M}$                   | Tris–HCl                               | S26              |

**Table S6** Quantum yield results of complex **6** after adding  $\text{Cr}_2\text{O}_7^{2-}$ ,  $\text{CrO}_4^{2-}$ , CTC or TC

| Sample        | <b>6@Cr<sub>2</sub>O<sub>7</sub><sup>2-</sup></b> | <b>6@CrO<sub>4</sub><sup>2-</sup></b> | <b>6@CTC</b> | <b>6@TC</b> |
|---------------|---------------------------------------------------|---------------------------------------|--------------|-------------|
| Quantum yield | 22.6%                                             | 22.5%                                 | 23.9%        | 23.4%       |

**Table S7.** Resonance energy transfer efficiency of complex **6**. ( $E = 1 - \tau_1 / \tau_0$ , where  $\tau_1$  and  $\tau_0$  are the excited-state lifetime of  $\text{Cr}_2\text{O}_7^{2-}$ ,  $\text{CrO}_4^{2-}$ , CTC or TC in the presence and absence of complex **6**)

| Excited-state lifetime / ms                       | $\tau_0$ | $\tau_1$ | Resonance energy transfer efficiency (E) |
|---------------------------------------------------|----------|----------|------------------------------------------|
| <b>6</b>                                          | 1.097    |          |                                          |
| <b>6@Cr<sub>2</sub>O<sub>7</sub><sup>2-</sup></b> |          | 1.062    | 3.2%                                     |
| <b>6@CrO<sub>4</sub><sup>2-</sup></b>             |          | 1.074    | 2.1%                                     |
| <b>6@CTC</b>                                      |          | 1.081    | 1.5%                                     |
| <b>6@TC</b>                                       |          | 1.084    | 1.2%                                     |



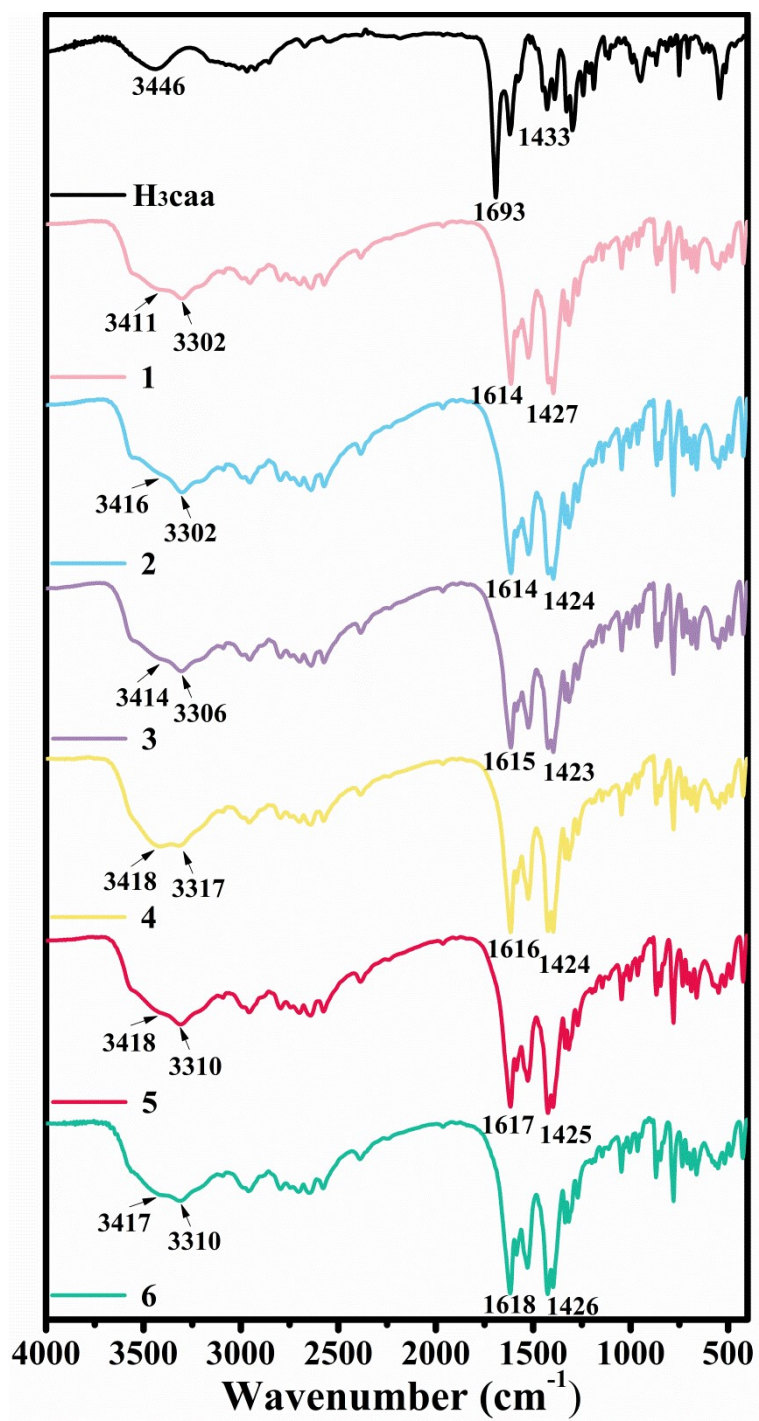

Fig. S1 IR spectra of ligand ( $H_3caa$ ) and complexes 1 – 6 (KBr,  $cm^{-1}$ )

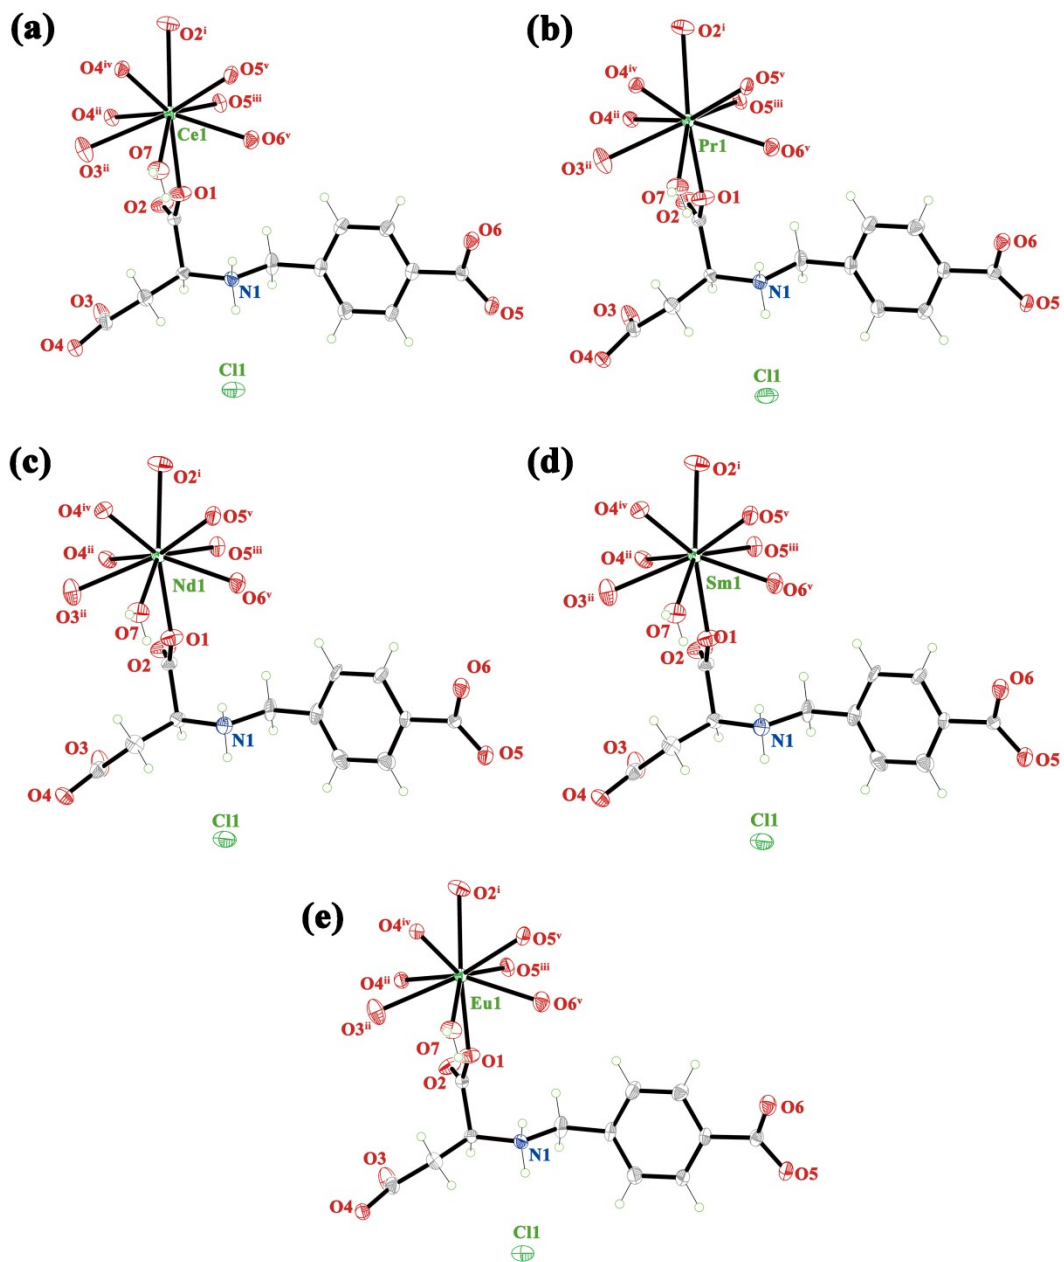

Fig. S2 Coordination environment diagrams of complexes 1 – 5

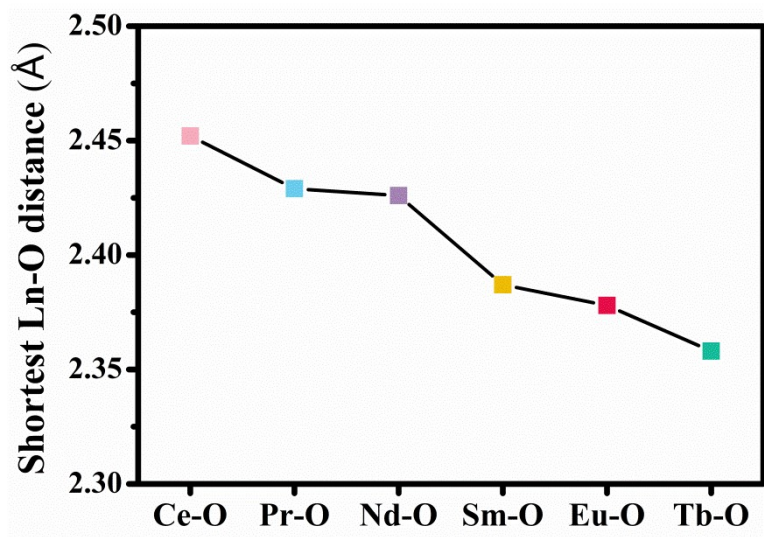

Fig. S3 The shortest Ln-O bond length of complexes 1 – 6

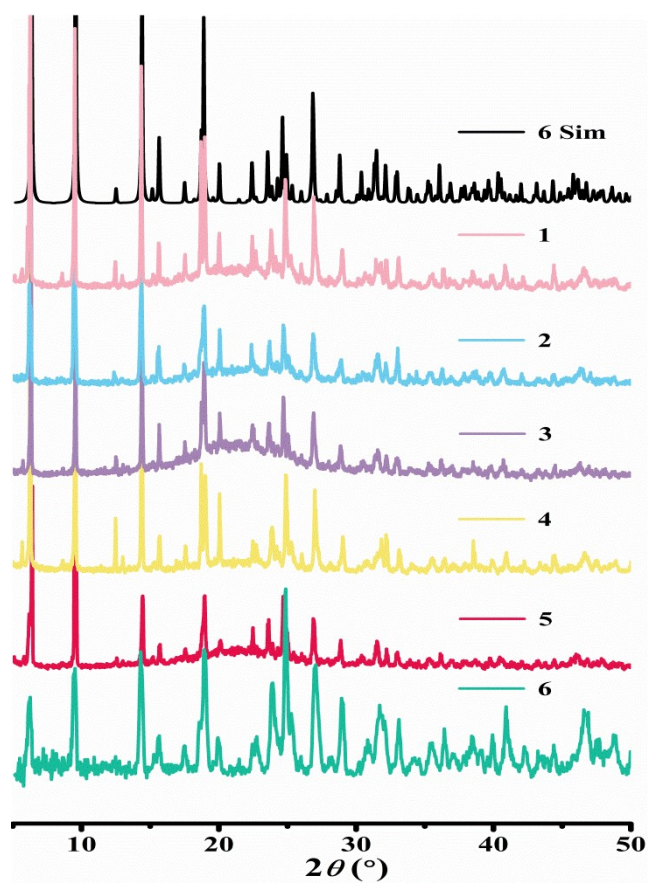

Fig. S4 PXR D patterns (simulated and experimental) for complexes 1 – 6 in the  $2\theta$  range of 5 to

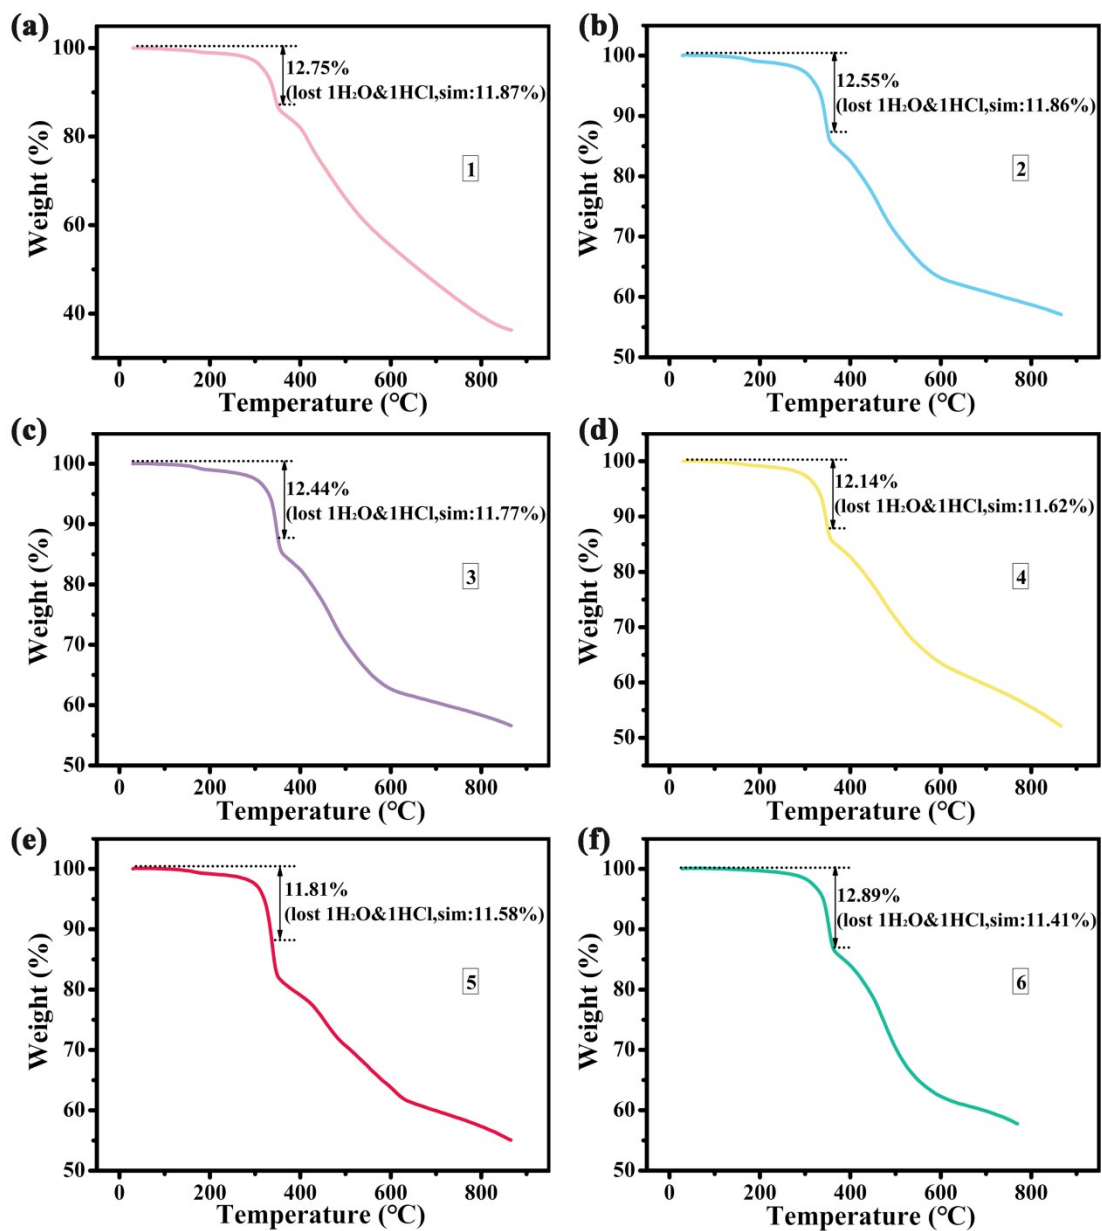

Fig. S5 TGA curves for complexes 1 – 6 collected under air atmosphere

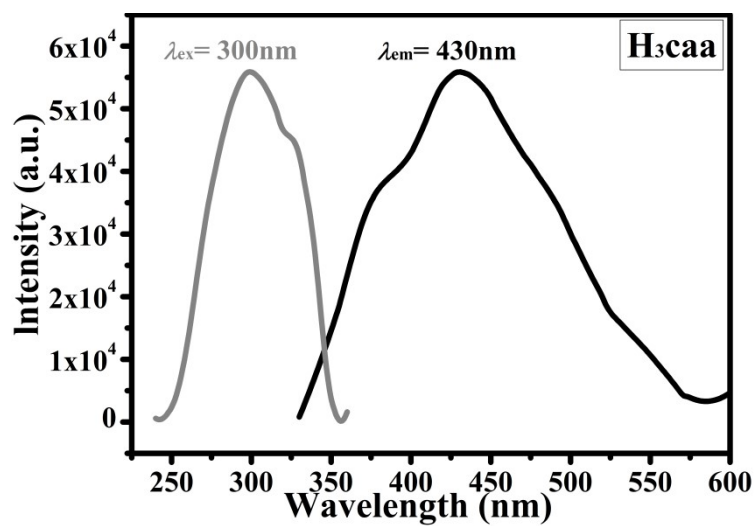

Fig. S6 Solid-state luminescent spectra of ligand (H<sub>3</sub>caa)

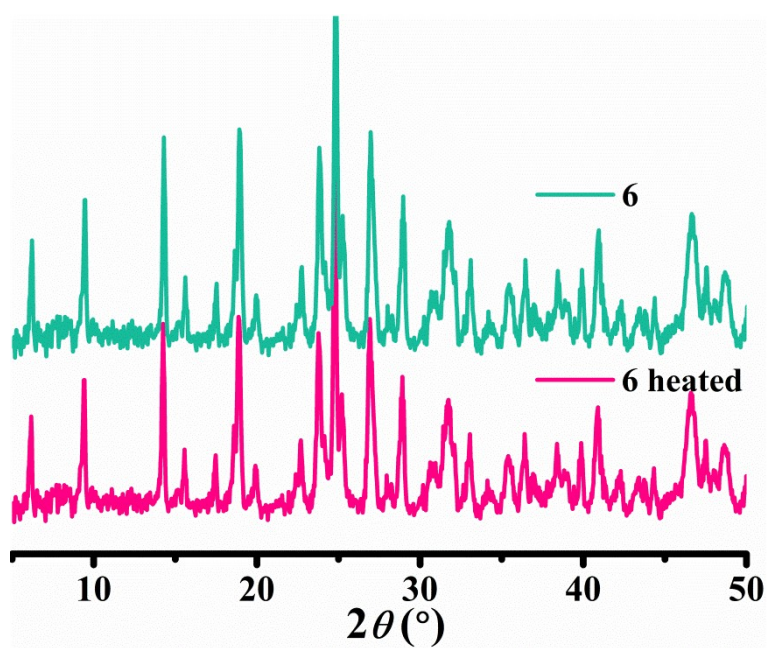

Fig. S7 PXRD patterns of complex 6 at room temperature (green) and after heating at 95°C (pink)

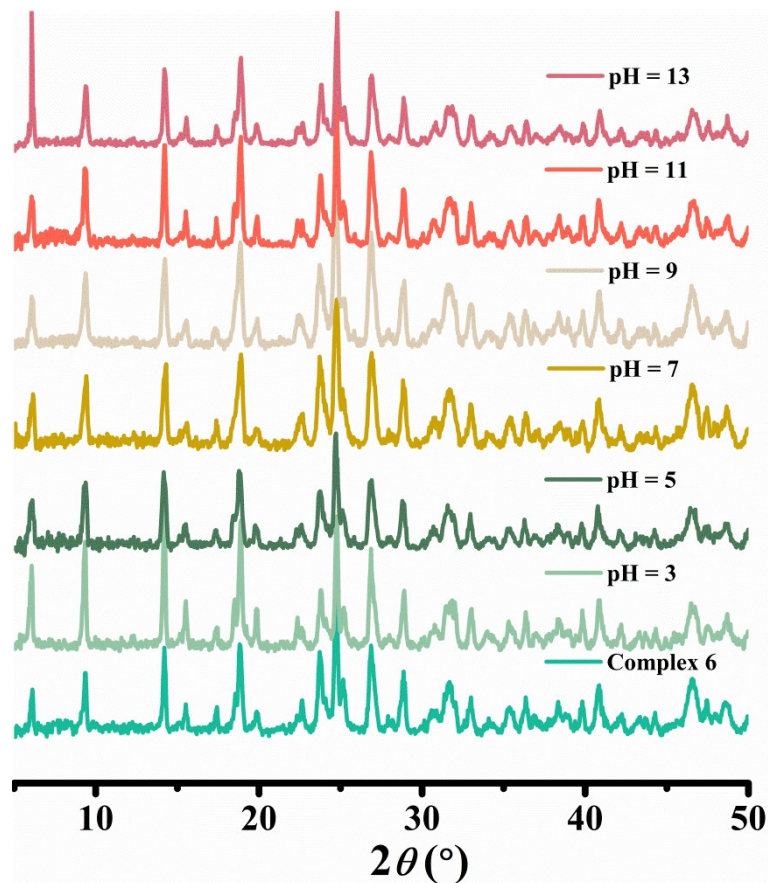

Fig. S8 PXRD patterns of complex 6 before (green) and after soaking in different pH = 3 – 13

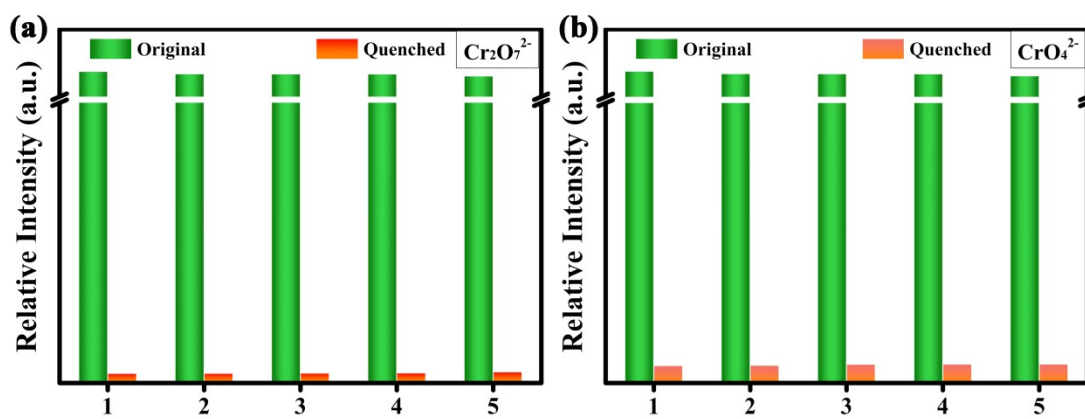

Fig. S9 Fluorescence intensity for the recognition of (a)  $\text{Cr}_2\text{O}_7^{2-}$  or (b)  $\text{CrO}_4^{2-}$  after five cycles of isolation and re-suspending complex 6 in water

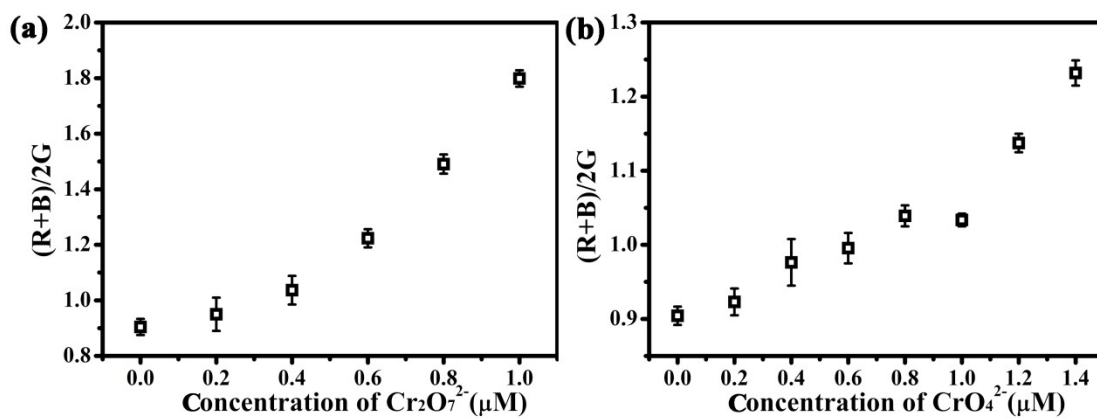

Fig. S10 Standard curves of  $(R + B) / 2G$  formula to qualitatively analyse the strips of (a)  $\text{Cr}_2\text{O}_7^{2-}$  or (b)  $\text{CrO}_4^{2-}$

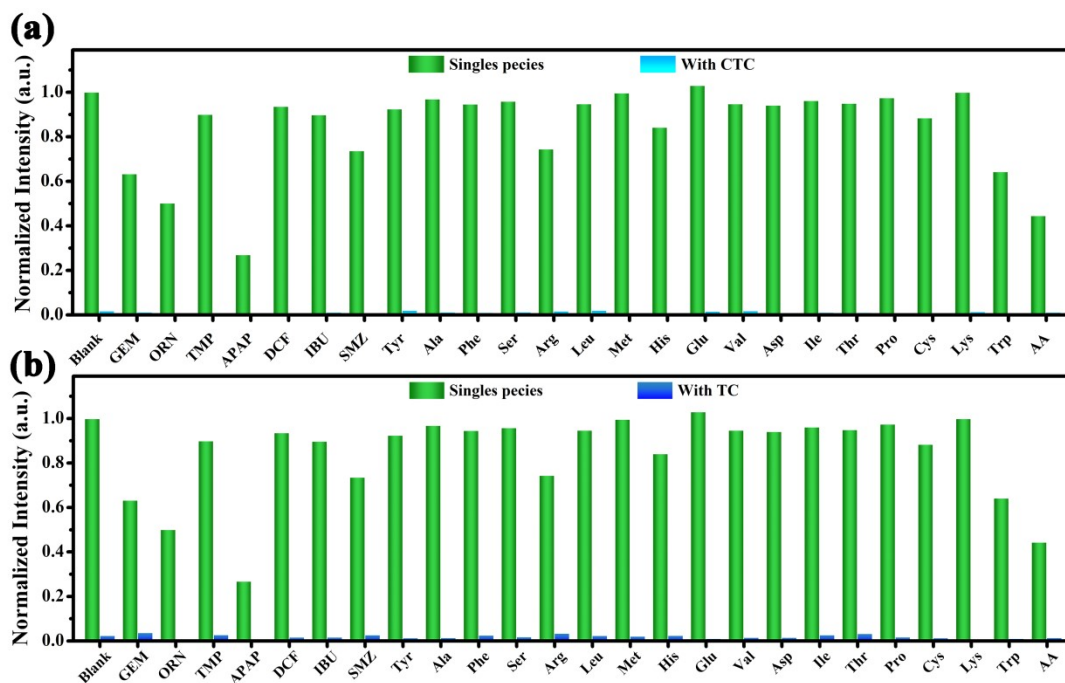

Fig. S11 Anti-interference of complex 6 to (a) CTC or (b) TC in the presence of other biomolecules at 543 nm

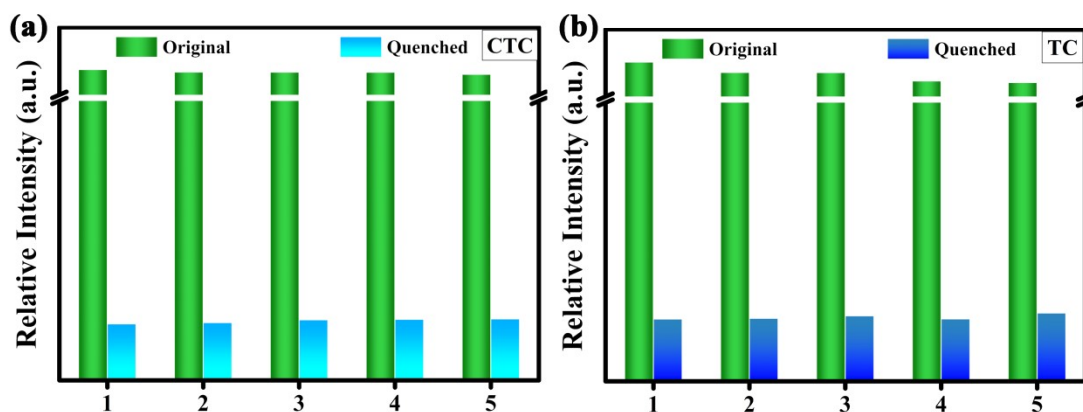

Fig. S12 Fluorescence intensity for the recognition of (a) CTC or (b) TC after five cycles of isolation and re-suspending complex 6 in water

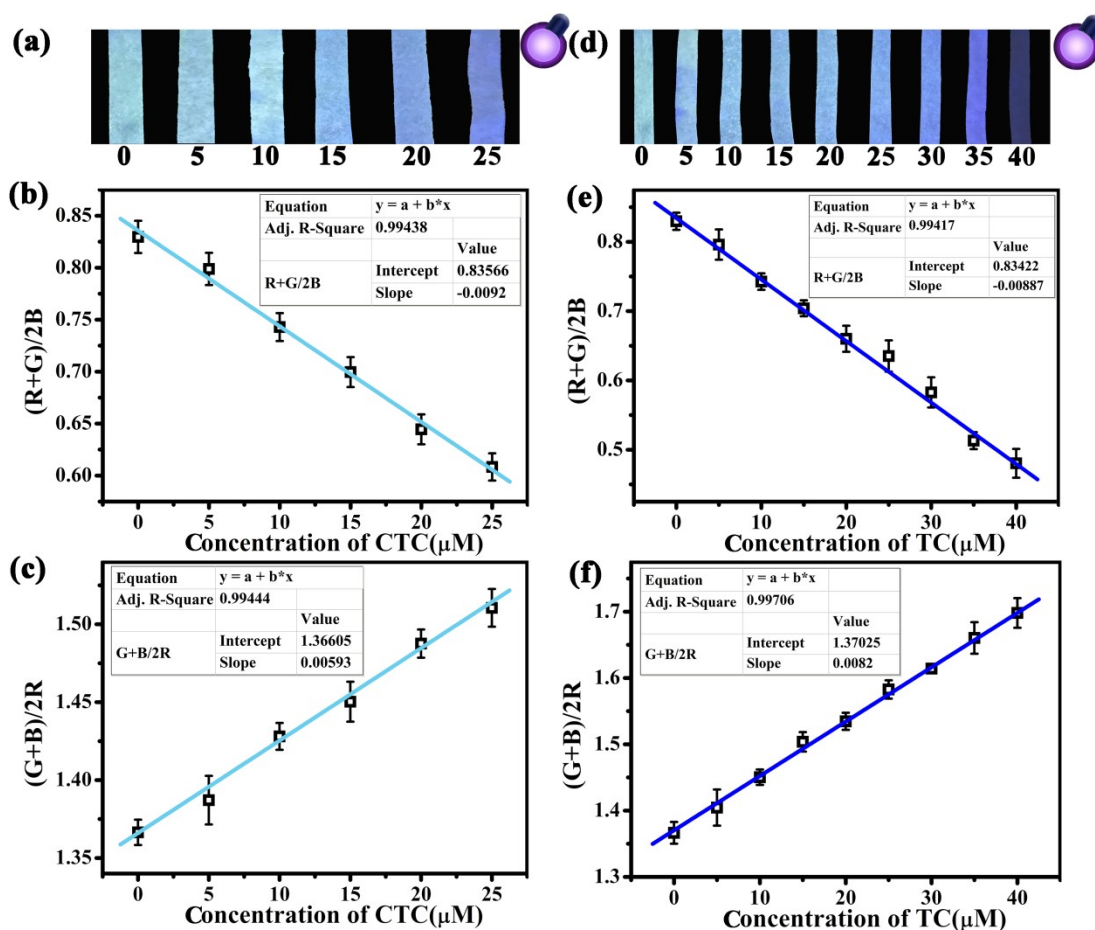

Fig. S13 Color changes of complex 6 strips for detecting (a) CTC (0 ~ 25  $\mu\text{M}$ ) or (d) TC (0 ~ 40

$\mu\text{M}$ ). The standard curves of (b, e)  $(R + G) / 2B$  formula and (c, f)  $(G + B) / 2R$  formula to

qualitatively analyse the strip



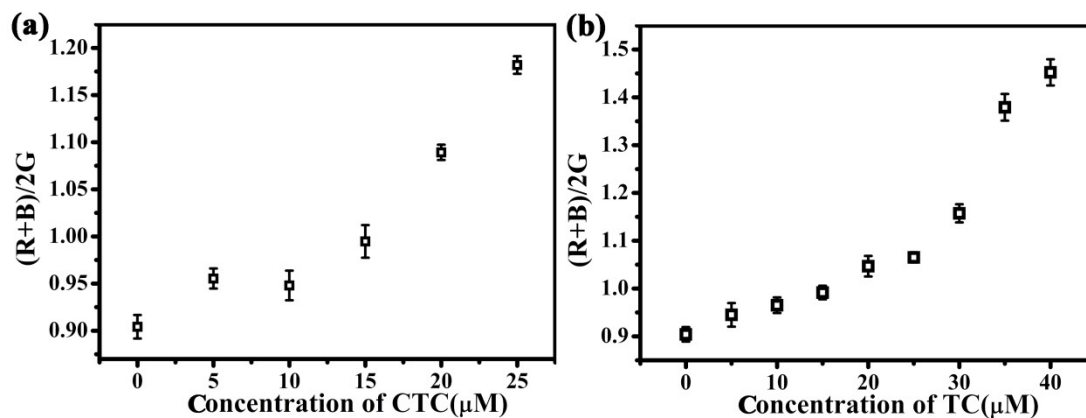

Fig. S14 Standard curves of  $(R + B) / 2G$  formula to qualitatively analyse the strips of (a) CTC or

(b) TC

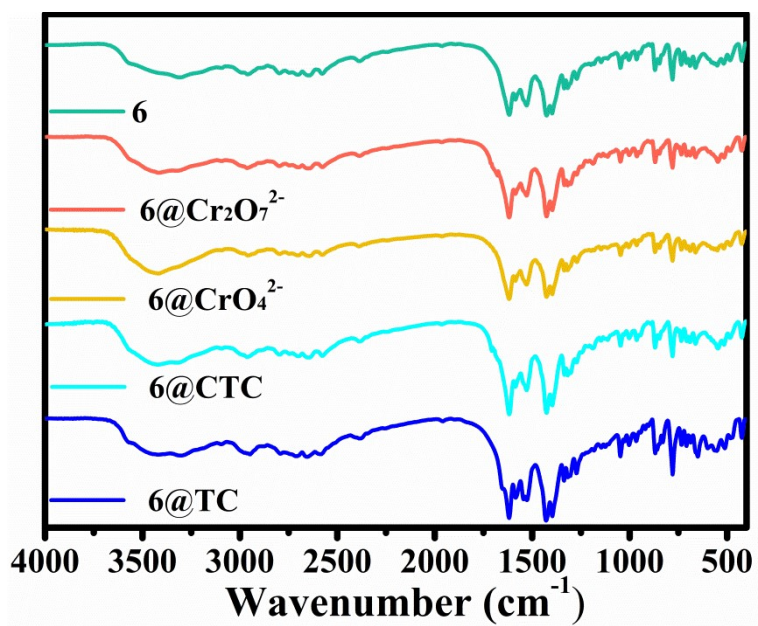

Fig. S15 IR spectra of complex 6 before and after soaking in  $Cr_2O_7^{2-}$ ,  $CrO_4^{2-}$ , CTC or TC for 7

days

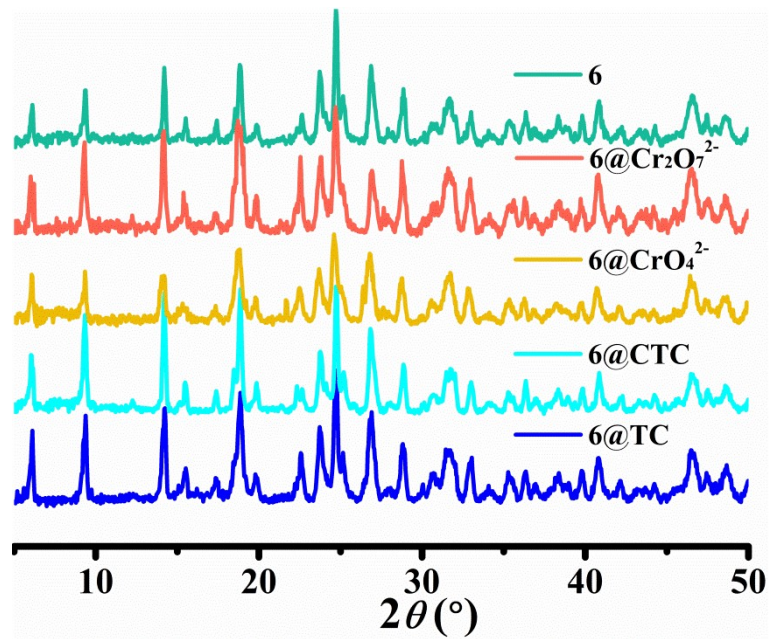

**Fig. S16** PXRD patterns of complex **6** before and after soaking in Cr<sub>2</sub>O<sub>7</sub><sup>2-</sup>, CrO<sub>4</sub><sup>2-</sup>, CTC or TC for 7 days

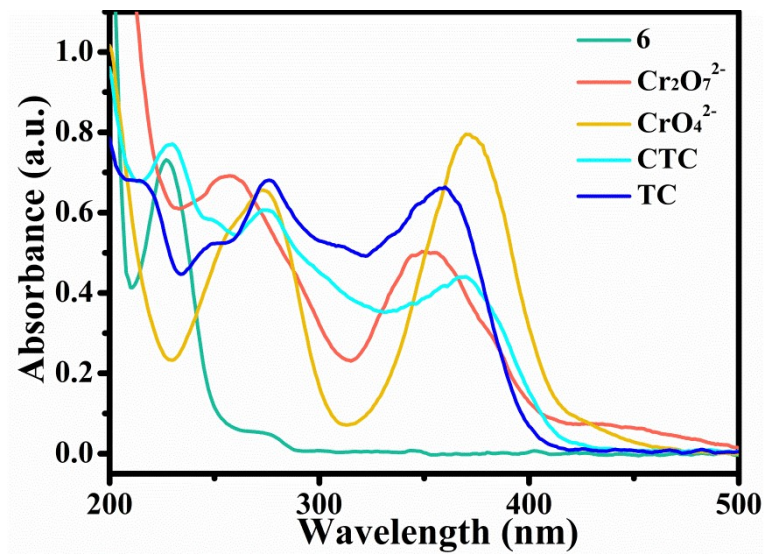

**Fig. S17** Liquid UV-vis spectra of complex **6**, Cr<sub>2</sub>O<sub>7</sub><sup>2-</sup>, CrO<sub>4</sub><sup>2-</sup>, CTC and TC in the aqueous solution

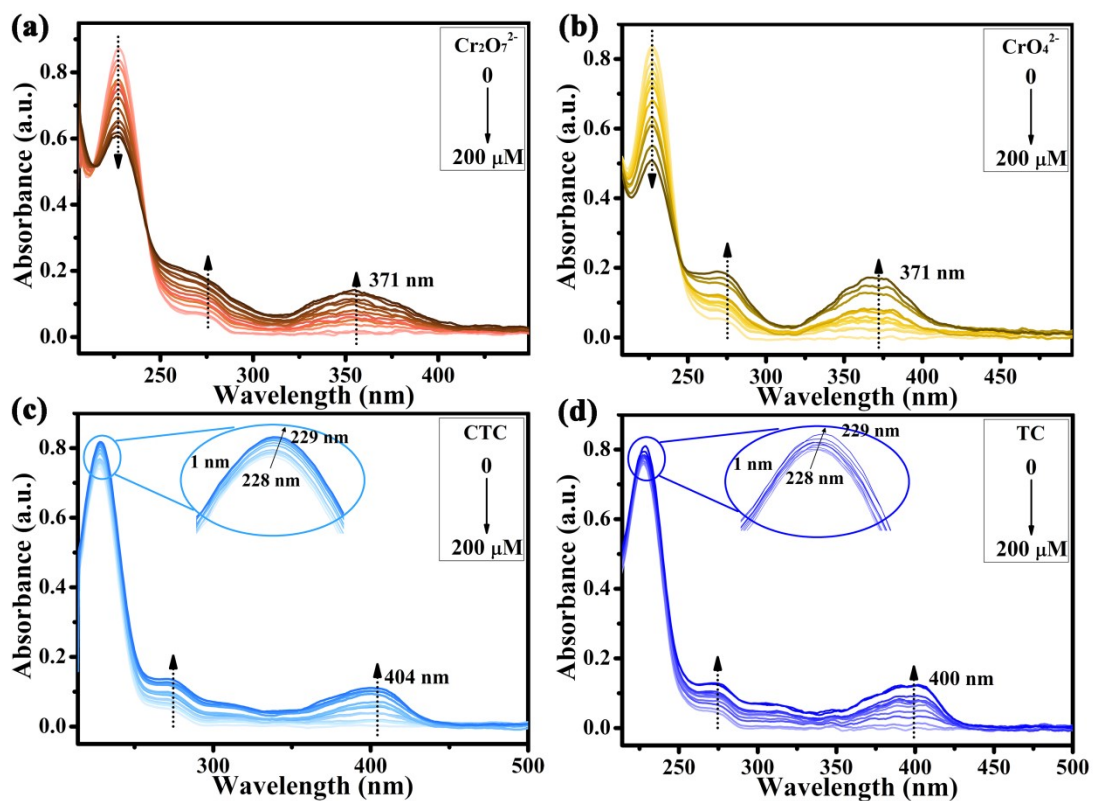

Fig. S18 Liquid UV-vis spectra of complex 6 with the addition of different concentrations of

$\text{Cr}_2\text{O}_7^{2-}$ ,  $\text{CrO}_4^{2-}$ , CTC or TC

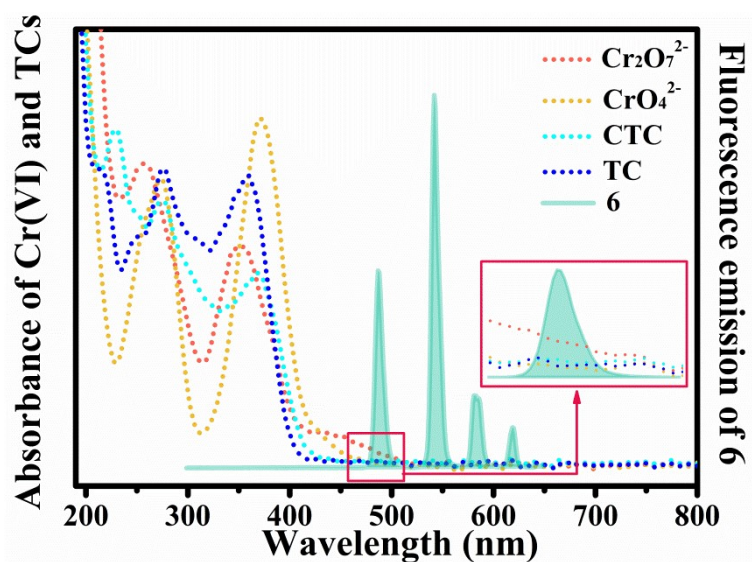

Fig. S19 Emission spectrum of complex 6 and the absorption spectra of  $\text{Cr}_2\text{O}_7^{2-}$ ,  $\text{CrO}_4^{2-}$ , CTC and

TC

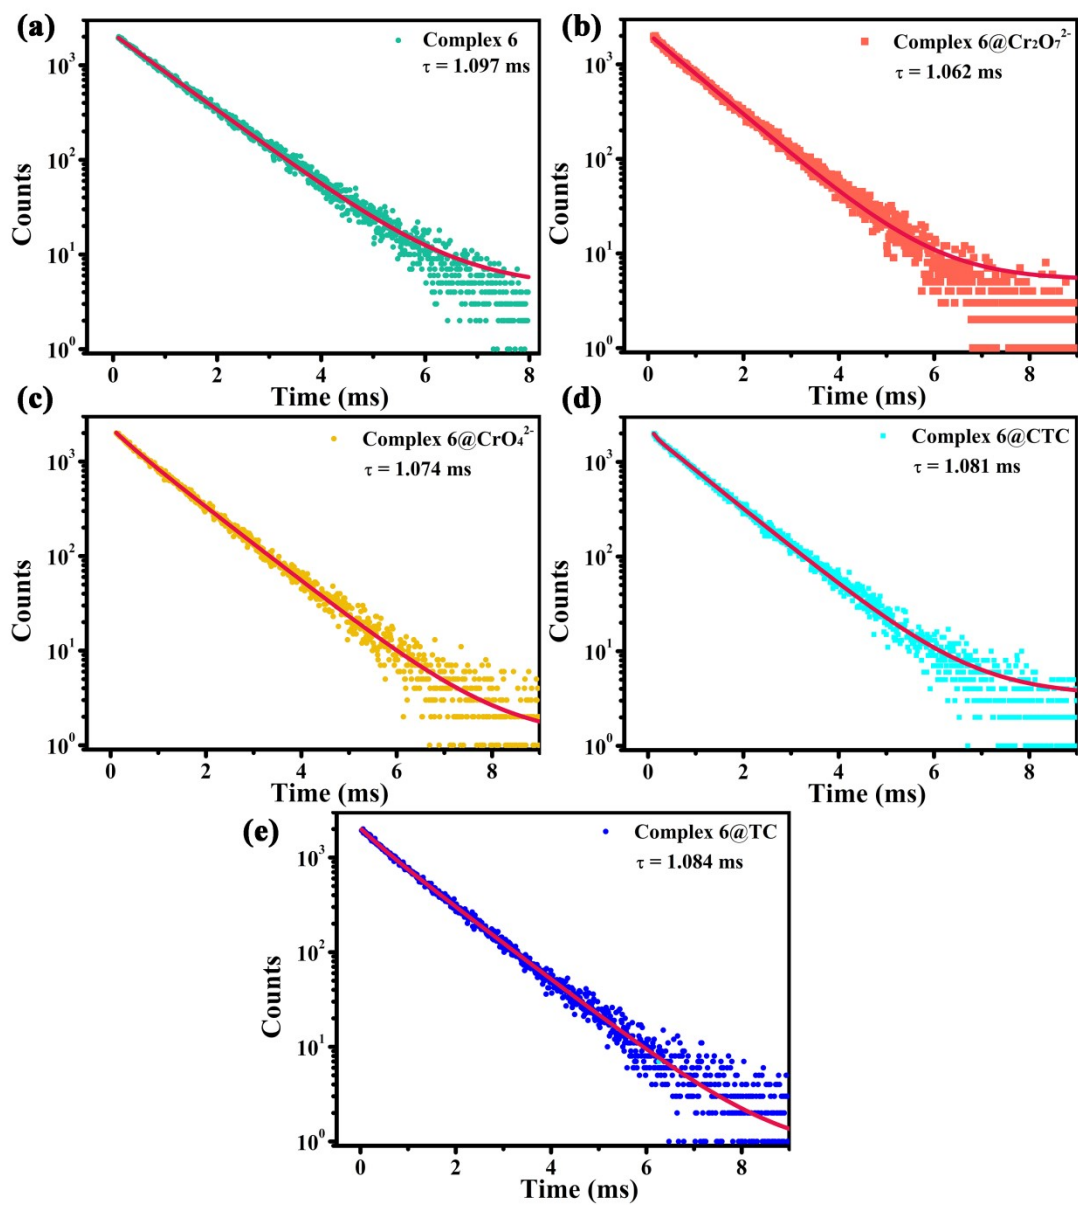

Fig. S20 Photoluminescence decay times of complex 6 before and after loading in Cr<sub>2</sub>O<sub>7</sub><sup>2-</sup>, CrO<sub>4</sub><sup>2-</sup>,

CTC or TC

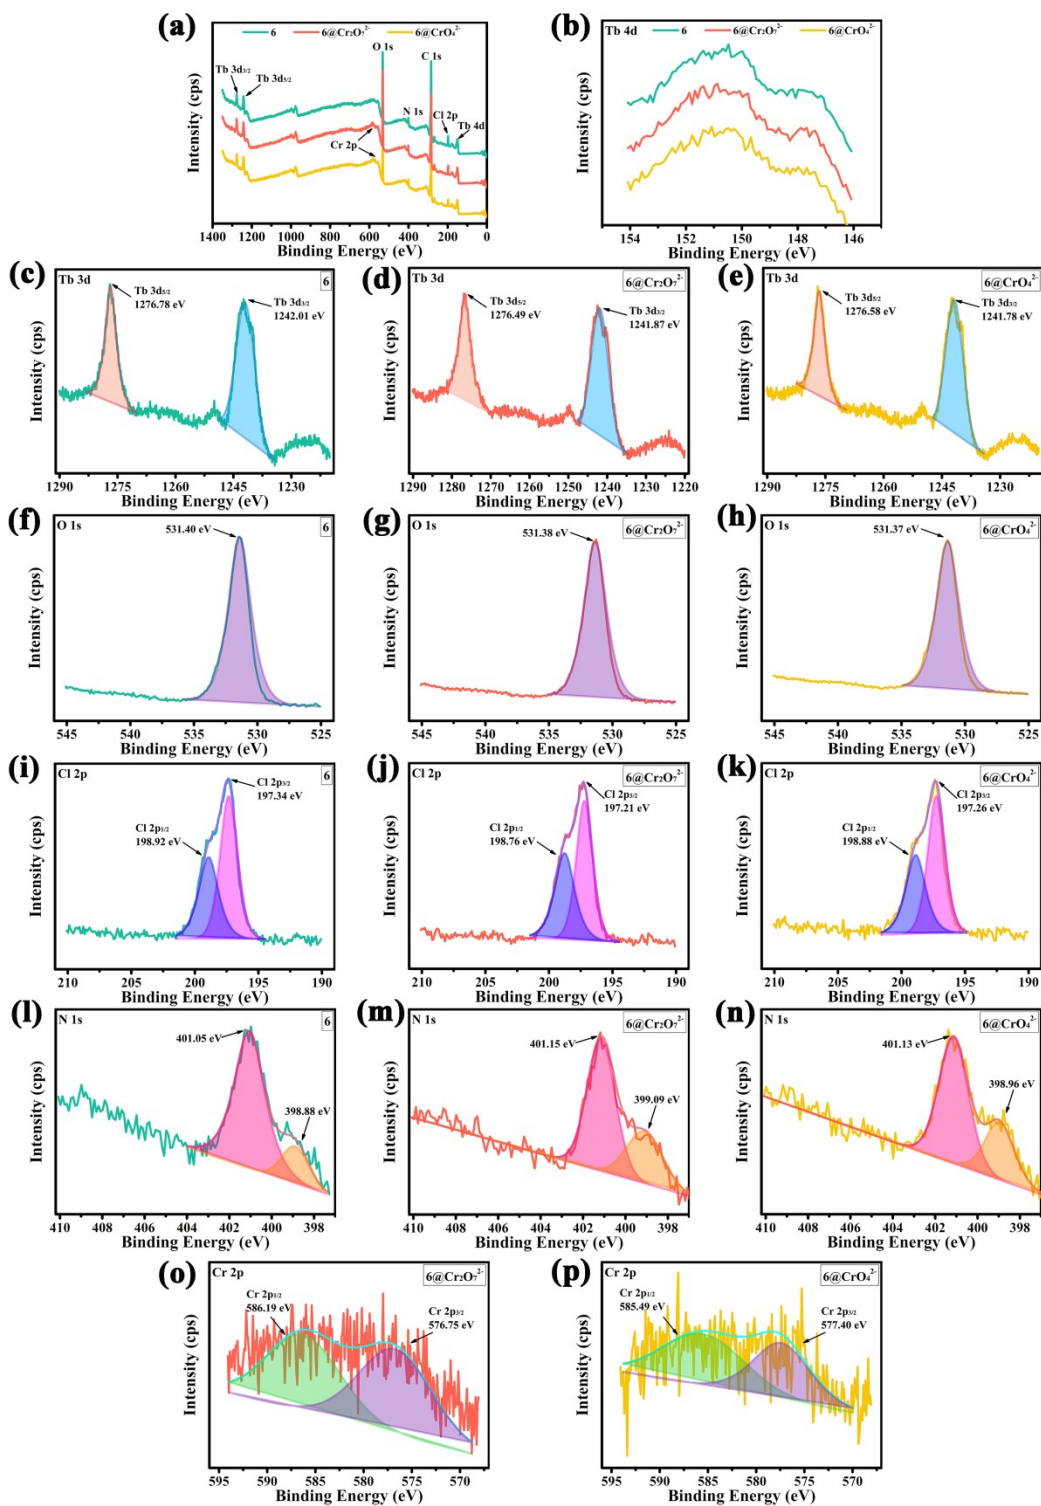

Fig. S21 XPS spectra of complex 6 before and after loading in  $\text{Cr}_2\text{O}_7^{2-}$  or  $\text{CrO}_4^{2-}$

## References

S1. Bruker (2014). *XPREP* (Version 2014/2) and *SADABS* (Version 2014/4). Bruker AXS Inc., Madison, Wisconsin, USA.

- S2. Sheldrick, G. A short history of SHELX, *Acta Crystallographica Section A* 2008; 64: 112–122.
- S3. Price, J.; Balonova, B.; Blight, B. A.; Eisler, S., Shedding light on predicting and controlling emission chromaticity in multicomponent photoluminescent systems. *Chem. Sci* 2021, 12, 12092.
- S4. Ren, Y. B.; Xu, H. Y.; Yan, J. W.; Cao, D. X.; Du, J. L., Multifunctional luminescent Zr(IV)-MOF for rapid and efficient detection of vanillin,  $\text{CrO}_4^{2-}$  and  $\text{Cr}_2\text{O}_7^{2-}$  ions. *Spectrochim Acta A Mol Biomol Spectrosc* 2022, 278, 121390.
- S5. Chen, W.; Fan, R.; Fan, J.; Liu, H.; Sun, T.; Wang, P.; Yang, Y., Lanthanide Coordination Polymer-Based Composite Films for Selective and Highly Sensitive Detection of  $\text{Cr}_2\text{O}_7^{2-}$  in Aqueous Media. *Inorg Chem* 2019, 58 (22), 15118-15125.
- S6. Zhang, J.; Liu, J.; Li, X.; Xu, Y., Solvent-free synthesis of hierarchical  $\text{Tb}^{3+}$ -doped Yttrium benzene-1,3,5-tricarboxylate metal organic framework nanosheets for fast and highly sensitive fluorescence detection of  $\text{Fe}^{3+}$  and  $\text{Cr}_2\text{O}_7^{2-}$  ions. *Resources Chemicals and Materials* 2022, 1 (2), 146-151.
- S7. Gao, T.; Ren, Y.; Wang, Z.; Zhang, M.; Cao, J.; Wang, J., A multi-functional Tb-organic network featuring high selectivity fluorescent sensing for  $\text{Fe}^{3+}$ ,  $\text{Cr}_2\text{O}_7^{2-}$ , tetracycline and 2,4,6-trinitrophenol in aqueous solution. *Journal of Solid State Chemistry* 2022, 309.
- S8. Yin, J.; Chu, H.; Qin, S.; Qi, H.; Hu, M., Preparation of  $\text{Eu}_{0.075}\text{Tb}_{0.925}$ -Metal Organic Framework as a Fluorescent Probe and Application in the Detection of  $\text{Fe}^{3+}$  and  $\text{Cr}_2\text{O}_7^{2-}$ . *Sensors (Basel)* 2021, 21 (21).
- S9. Sheng, D.; Sun, F.; Yu, Y. e.; Wang, Y.; Lu, J.; Li, Y.; Wang, S.; Dou, J.; Li, D., 1-D multifunctional Ln-CPs: Luminescence probes for  $\text{Fe}^{3+}$  and Cr(VI) and uncommon discriminative detection between  $\text{Cr}_2\text{O}_7^{2-}$  and  $\text{CrO}_4^{2-}$  of Tb-CP in various media. *Journal of Luminescence* 2019, 213, 140-150.
- S10. Helal, A.; Nasiruzzaman Shaikh, M.; Abdul Aziz, M., Dual sensing of copper ion and chromium (VI) oxyanions by benzotriazole functionalized UiO-66 metal-organic framework in aqueous media. *Journal of Photochemistry and Photobiology A: Chemistry* 2020, 389.

- S11. Sun, Z.; Yang, M.; Ma, Y.; Li, L., Multi-Responsive Luminescent Sensors Based on Two-Dimensional Lanthanide–Metal Organic Frameworks for Highly Selective and Sensitive Detection of Cr(III) and Cr(VI) Ions and Benzaldehyde. *Crystal Growth & Design* 2017, 17 (8), 4326-4335.
- S12. Liu, J.; Liu, S.; Ma, J.; Diao, Y.; Li, M.; He, J.; Chen, S.; Zhang, Q., A Stable 2D Zr(IV)-Based Metal-Organic Framework (USTS-7) for Selective Sensing of  $\text{Cr}_2\text{O}_7^{2-}$  in Aqueous Solution. *Inorg Chem* 2020, 59 (24), 17884-17888.
- S13. Li, J.; Tian, J.; Yu, H.; Fan, M.; Li, X.; Liu, F.; Sun, J.; Su, Z., Controllable Synthesis of Metal–Organic Frameworks Based on Anthracene Ligands for High-Sensitivity Fluorescence Sensing of  $\text{Fe}^{3+}$ ,  $\text{Cr}_2\text{O}_7^{2-}$ , and TNP. *Crystal Growth & Design* 2022, 22 (5), 2954-2963.
- S14. Li, J.; Xiao, Y.; Wang, L.; Xing, Y.; Bai, F.; Shi, Z., Oriented construction of the Mixed-metal organic framework with triazine hexacarboxylic acid and fluorescence detection:  $\text{Fe}^{3+}$ ,  $\text{Cr}_2\text{O}_7^{2-}$  and TNP. *Polyhedron* 2022, 214.
- S15. Cao, Y.; Zhang, Y.; Gu, L.; Qin, X.; Li, H.; Bian, H.; Huang, F., A zinc<sup>2+</sup>-dpbt framework: luminescence sensing of  $\text{Cu}^{2+}$ ,  $\text{Ag}^+$ ,  $\text{MnO}_4^-$  and Cr(vi) ( $\text{Cr}_2\text{O}_7^{2-}$  and  $\text{CrO}_4^{2-}$ ) ions. *New Journal of Chemistry* 2020, 44 (25), 10681-10688.
- S16. Guo, F.; Chu, Z.; Zhao, M.; Zhu, B.; Zhang, X., A dual-responsive luminescent TbIII-organic framework with high water stability for selective sensing of  $\text{Fe}^{3+}$  and  $\text{Cr}_2\text{O}_7^{2-}$  in water systems. *Inorganic Chemistry Communications* 2019, 104, 71-77.
- S17. Li, Z.; Zhan, Z.; Hu, M., A luminescent terbium coordination polymer as a multifunctional water-stable sensor for detection of  $\text{Pb}^{2+}$  ions,  $\text{PO}_4^{3-}$  ions,  $\text{Cr}_2\text{O}_7^{2-}$  ions, and some amino acids. *CrystEngComm* 2020, 22 (40), 6727-6737.
- S18. Xi, W. K.; Ma, G.; Wang, X. G.; Sun, Z. H.; Li, J.; Zhang, L., A multifunctional 3D Cd-based metal-organic frameworks for the highly luminescence sensitive detection of  $\text{CrO}_4^{2-}$  /  $\text{Cr}_2\text{O}_7^{2-}$  and nitro aromatic compounds. *Polyhedron* 2020, 188.
- S19. Wei, W.; Zhang, X.; Lu, L.; Feng, S., Novel 2D isomorphic lanthanide complexes based on a bifunctional 5-(pyridin-3-yloxy)isophthalic acid: synthesis, structure, fluorescence and magnetic properties. *CrystEngComm* 2022, 24 (35), 6204-

6214.

S20. Liu, Y.; Yan, K.; Zhang, J., Graphitic Carbon Nitride Sensitized with CdS Quantum Dots for Visible-Light-Driven Photoelectrochemical Aptasensing of Tetracycline. *ACS Appl Mater Interfaces* 2016, 8 (42), 28255-28264.

S21. Jia, L.; Chen, R.; Xu, J.; Zhang, L.; Chen, X.; Bi, N.; Gou, J.; Zhao, T., A stick-like intelligent multicolor nano-sensor for the detection of tetracycline: The integration of nano-clay and carbon dots. *J Hazard Mater* 2021, 413, 125296.

S22. Xu, J.; Guo, S.; Jia, L.; Zhu, T.; Chen, X.; Zhao, T., A smartphone-integrated method for visual detection of tetracycline. *Chemical Engineering Journal* 2021, 416.

S23. Cao, Q. L.; Wang, R. T.; Duan, J. Y.; Dong, G. Y., Two stable cadmium(II) coordination polymers for fluorimetric detection of tetracycline and Fe<sup>3+</sup> ions. *Journal of Solid State Chemistry* 2022, 307.

S24. Gan, Z.; Hu, X.; Xu, X.; Zhang, W.; Zou, X.; Shi, J.; Zheng, K.; Arslan, M., A portable test strip based on fluorescent europium-based metal-organic framework for rapid and visual detection of tetracycline in food samples. *Food Chem* 2021, 354, 129501.

S25. Chen, J.; Xu, Y.; Li, S.; Xu, F.; Zhang, Q., Ratio fluorescence detection of tetracycline by a Eu<sup>3+</sup>/NH<sub>2</sub>-MIL-53(Al) composite. *RSC Adv* 2021, 11 (4), 2397-2404.

S26. Liu, Q.; Ning, D.; Li, W. J.; Du, X. M.; Wang, Q.; Li, Y.; Ruan, W. J., Metal-organic framework-based fluorescent sensing of tetracycline-type antibiotics applicable to environmental and food analysis. *Analyst* 2019, 144 (6), 1916-1922.

S27. Zhang, Y.; Lv, M.; Gao, P.; Zhang, G.; Shi, L.; Yuan, M.; Shuang, S., The synthesis of high bright silver nanoclusters with aggregation-induced emission for detection of tetracycline. *Sensors and Actuators B: Chemical* 2021, 326.

S28. Fernandes-Junior, W. S.; Zaccarin, L. F.; Oliveira, G. G.; de Oliveira, P. R.; Kalinke, C.; Bonacin, J. A.; Prakash, J.; Janegitz, B. C.; Srivastava, S. K., Electrochemical Sensor Based on Nanodiamonds and Manioc Starch for Detection of Tetracycline. *Journal of Sensors* 2021, 2021, 1-10.

S29. Liu, M.; Xia, S.; Liu, Z.; Ma, T.; Liu, Z.; Li, Y.; Zou, D., Luminescent porous



metal–organic gels for efficient adsorption and sensitive detection of chlortetracycline hydrochloride assisted by smartphones and a test paper-based analytical device. *Inorganic Chemistry Frontiers* 2022, 9 (8), 1722-1734.

S30. Li, R.; Wang, W.; El-Sayed, E. S. M.; Su, K.; He, P.; Yuan, D., Ratiometric fluorescence detection of tetracycline antibiotic based on a polynuclear lanthanide metal–organic framework. *Sensors and Actuators B: Chemical* 2021, 330.

S31. Guo, Y.; Hu, Y.; Chen, S; Guo, M.; Zhang, Y.; Han, X.; Zhang, S., Facile one-pot synthesis of tannic acid-stabilized fluorescent copper nanoclusters and its application as sensing probes for chlortetracycline based on inner filter effect. *Colloids and Surfaces A: Physicochemical and Engineering Aspects* 2022, 634.

S32. Zhang, W.; Li, X.; Liu, Q.; Liu, G.; Yue, G.; Yang, Z.; Wang, Y.; Rao, H.; Chen, Y.; Lu, C.; Wang, X., Nitrogen-doped carbon dots from rhizobium as fluorescence probes for chlortetracycline hydrochloride. *Nanotechnology* 2020, 31 (44), 445501.
